# Supplementary material
Source: publisher figshare collection journal article supplement (https://sage.figshare.com/ndownloader/files/30771778)
Supplement: Supplementary file 1 [file 30771778]

## Sheet: ATP5A1_vs_Ctrl_Sig_DEG
Gene	logFC	logCPM	PValue	FDR	ATP5A1_1st	ATP5A1_2nd	Ctrl_1st	Ctrl_2nd	Symbol	Chr	GeneType	Description
ENSG00000130701.3	6.42462	-2.16268	1.16345e-06	0.00195527	0.2	0	0	0	RBBP8NL	chr20	protein_coding	RBBP8 N-terminal like
ENSG00000270722.1	6.20945	-2.31746	7.43866e-06	0.00708409	2.53	0.42	0	0	U1	chr1	snRNA	--
ENSG00000188676.13	6.13037	-2.37285	1.38992e-05	0.0116794	0.16	0.04	0	0	IDO2	chr8	protein_coding	indoleamine 2,3-dioxygenase 2
ENSG00000234981.1	6.12598	-2.37521	2.60595e-05	0.0206811	0.36	0.2	0	0	RP11-534L20.4	chr1	processed_pseudogene	--
ENSG00000230086.1	6.03956	-2.43433	4.90279e-05	0.0298027	0.21	0.26	0	0	VN1R96P	chr19	unitary_pseudogene	vomeronasal 1 receptor 96 pseudogene
ENSG00000274354.1	5.96751	-2.48546	4.90279e-05	0.0298027	0.58	0	0	0	RP11-1151B14.5	chr18	sense_intronic	--
ENSG00000152234.15	5.92867	13.0967	3.00309e-144	8.57983e-140	3249.96	1461	38.31	39.94	ATP5A1	chr18	protein_coding	ATP synthase, H+ transporting, mitochondrial F1 complex, alpha subunit 1, cardiac muscle
ENSG00000106560.10	5.85435	-2.55816	0.000175374	0.0556716	0.02	0.19	0	0	GIMAP2	chr7	protein_coding	GTPase, IMAP family member 2
ENSG00000239219.2	5.75871	-2.62089	0.000333462	0.0842912	0.01	0.04	0	0	RP11-379K17.4	chr3	antisense	--
ENSG00000275291.1	5.67116	-2.67856	0.000333462	0.0842912	2.08	0	0	0	U1	chr1	snRNA	--
ENSG00000243024.6	5.65902	-2.68499	0.000636352	0.106945	0.06	0.09	0	0	RPS11P6	chr12	transcribed_processed_pseudogene	ribosomal protein S11 pseudogene 6
ENSG00000214102.7	5.65298	-2.68819	0.000636352	0.106945	0.01	0.09	0	0	WEE2	chr7	protein_coding	WEE1 homolog 2 (S. pombe)
ENSG00000280387.1	5.55119	-2.75233	0.000636352	0.106945	0.17	0.07	0	0	RP5-1153D9.5	chr20	TEC	--
ENSG00000158869.10	5.54814	-2.75394	0.000636352	0.106945	0.17	0.15	0	0	FCER1G	chr1	protein_coding	Fc fragment of IgE, high affinity I, receptor for; gamma polypeptide
ENSG00000240219.1	5.54661	-2.75475	0.000636352	0.106945	0.06	0.07	0	0	RP11-430C7.5	chr1	lincRNA	--
ENSG00000250033.5	5.539	-2.75877	0.00121881	0.150093	0	0.05	0	0	SLC7A11-AS1	chr4	processed_transcript	SLC7A11 antisense RNA 1
ENSG00000188001.9	5.43075	-2.82487	0.00121881	0.150093	0.03	0.01	0	0	TPRG1	chr3	protein_coding	tumor protein p63 regulated 1
ENSG00000183570.16	5.42921	-2.82568	0.00121881	0.150093	0.08	0.03	0	0	PCBP3	chr21	protein_coding	poly(rC) binding protein 3
ENSG00000225217.1	5.42305	-2.82892	0.00121881	0.150093	0.05	0.08	0	0	HSPA7	chr1	unprocessed_pseudogene	heat shock 70kDa protein 7 (HSP70B)
ENSG00000279699.1	5.42305	-2.82892	0.00121881	0.150093	0.06	0.09	0	0	RP1-102K2.9	chr22	TEC	--
ENSG00000267413.1	5.42305	-2.82892	0.00121881	0.150093	0.09	0.14	0	0	RP11-636O21.1	chr18	lincRNA	--
ENSG00000280231.1	5.42152	-2.82973	0.00234306	0.210625	0.16	0.38	0	0	LA16c-380F5.3	chr16	TEC	--
ENSG00000252585.1	5.41998	-2.83054	0.00234306	0.210625	0.46	1.81	0	0	Y_RNA	chr12	misc_RNA	--
ENSG00000196132.11	5.41692	-2.83216	0.00234306	0.210625	0	0.04	0	0	MYT1	chr20	protein_coding	myelin transcription factor 1
ENSG00000262732.1	5.41692	-2.83216	0.00234306	0.210625	0	0.05	0	0	CTD-2135D7.2	chr16	antisense	--
ENSG00000258232.2	5.29892	-2.90141	0.00234306	0.210625	0.38	0	0	0	RP11-161H23.5	chr12	antisense	--
ENSG00000271941.1	5.29892	-2.90141	0.00234306	0.210625	0.36	0	0	0	RP11-188P20.3	chr3	antisense	--
ENSG00000261684.1	5.29737	-2.90222	0.00234306	0.210625	0.28	0.03	0	0	RP11-265N6.1	chr15	antisense	--
ENSG00000273165.1	5.29581	-2.90304	0.00234306	0.210625	0.46	0.1	0	0	RP11-1057B6.1	chr2	lincRNA	--
ENSG00000155307.17	5.29581	-2.90304	0.00234306	0.210625	0.08	0.02	0	0	SAMSN1	chr21	protein_coding	SAM domain, SH3 domain and nuclear localization signals 1
ENSG00000255811.1	5.29581	-2.90304	0.00234306	0.210625	0.37	0.08	0	0	RP1-34M23.5	chr1	antisense	--
ENSG00000241959.3	5.29271	-2.90466	0.00234306	0.210625	0.54	0.31	0	0	RN7SL76P	chr7	misc_RNA	RNA, 7SL, cytoplasmic 76, pseudogene
ENSG00000263567.1	5.29271	-2.90466	0.00234306	0.210625	0.31	0.18	0	0	RP11-805L22.3	chr17	lincRNA	--
ENSG00000178772.6	5.29271	-2.90466	0.00234306	0.210625	0.05	0.03	0	0	CPN2	chr3	protein_coding	carboxypeptidase N, polypeptide 2
ENSG00000271930.1	5.29271	-2.90466	0.00234306	0.210625	0.31	0.18	0	0	RP11-44N12.5	chr8	lincRNA	--
ENSG00000229427.1	5.29116	-2.90548	0.00234306	0.210625	0.14	0.12	0	0	ANKRD26P4	chr13	processed_pseudogene	ankyrin repeat domain 26 pseudogene 4
ENSG00000261886.1	5.29116	-2.90548	0.00234306	0.210625	0.33	0.29	0	0	RP11-63A1.1	chr17	lincRNA	--
ENSG00000198216.10	5.28806	-2.9071	0.00234306	0.210625	0	0.01	0	0	CACNA1E	chr1	protein_coding	calcium channel, voltage-dependent, R type, alpha 1E subunit
ENSG00000219298.1	5.28652	-2.90792	0.00452123	0.282034	0.09	0.33	0	0	RP11-472G23.3	chr6	processed_pseudogene	--
ENSG00000234520.5	5.28343	-2.90954	0.00452123	0.282034	0	0.23	0	0	AC018464.3	chr7	lincRNA	--
ENSG00000225094.3	5.28343	-2.90954	0.00452123	0.282034	0	0.27	0	0	SETP20	chr4	processed_pseudogene	SET pseudogene 20
ENSG00000197408.8	5.15024	-2.98402	0.00452123	0.282034	0.08	0	0	0	CYP2B6	chr19	protein_coding	cytochrome P450, family 2, subfamily B, polypeptide 6
ENSG00000102802.9	5.15024	-2.98402	0.00452123	0.282034	0.1	0	0	0	MEDAG	chr13	protein_coding	mesenteric estrogen-dependent adipogenesis
ENSG00000081051.7	5.14867	-2.98484	0.00452123	0.282034	0.08	0.01	0	0	AFP	chr4	protein_coding	alpha-fetoprotein
ENSG00000260152.2	5.14867	-2.98484	0.00452123	0.282034	0.34	0.04	0	0	RP11-69H7.4	chr15	processed_pseudogene	--
ENSG00000257335.8	5.14867	-2.98484	0.00452123	0.282034	0.02	0	0	0	MGAM	chr7	protein_coding	maltase-glucoamylase
ENSG00000240401.8	5.14867	-2.98484	0.00452123	0.282034	0.11	0.01	0	0	AC012358.8	chr2	antisense	--
ENSG00000125810.9	5.14867	-2.98484	0.00452123	0.282034	0.03	0	0	0	CD93	chr20	protein_coding	CD93 molecule
ENSG00000140470.13	5.14867	-2.98484	0.00452123	0.282034	0.03	0	0	0	ADAMTS17	chr15	protein_coding	ADAM metallopeptidase with thrombospondin type 1 motif, 17
ENSG00000224985.1	5.1471	-2.98566	0.00452123	0.282034	0.48	0.12	0	0	RP11-297K8.2	chr1	antisense	--
ENSG00000272542.1	5.1471	-2.98566	0.00452123	0.282034	0.19	0.05	0	0	RP11-255P5.2	chr13	lincRNA	--
ENSG00000122432.16	5.14398	-2.9873	0.00452123	0.282034	0.05	0.03	0	0	SPATA1	chr1	transcribed_unprocessed_pseudogene	spermatogenesis associated 1
ENSG00000204866.8	5.14398	-2.9873	0.00452123	0.282034	0.14	0.1	0	0	IGFL2	chr19	protein_coding	IGF-like family member 2
ENSG00000225745.8	5.14242	-2.98811	0.00452123	0.282034	0.1	0.11	0	0	PLAC4	chr21	antisense	placenta-specific 4
ENSG00000261822.1	5.14242	-2.98811	0.00452123	0.282034	0.18	0.2	0	0	RP11-265N6.2	chr15	antisense	--
ENSG00000228792.2	5.14086	-2.98893	0.00452123	0.282034	0.13	0.23	0	0	RP11-354K1.2	chr1	lincRNA	--
ENSG00000101307.15	5.1393	-2.98975	0.00452123	0.282034	0.01	0.03	0	0	SIRPB1	chr20	protein_coding	signal-regulatory protein beta 1
ENSG00000223345.3	5.13774	-2.99056	0.00875741	0.370117	0.03	0.24	0	0	HIST2H2BA	chr1	transcribed_unprocessed_pseudogene	histone cluster 2, H2ba (pseudogene)
ENSG00000212391.1	5.13774	-2.99056	0.00875741	0.370117	0.19	1.36	0	0	SNORA48	chr2	snoRNA	small nucleolar RNA, H/ACA box 48
ENSG00000228482.1	5.13618	-2.99138	0.00875741	0.370117	0	0.22	0	0	RP5-859D4.3	chr20	lincRNA	--
ENSG00000241188.3	5.13618	-2.99138	0.00875741	0.370117	0	0.7	0	0	RN7SL165P	chr1	misc_RNA	RNA, 7SL, cytoplasmic 165, pseudogene
ENSG00000120329.6	5.13618	-2.99138	0.00875741	0.370117	0	0.14	0	0	SLC25A2	chr5	protein_coding	solute carrier family 25 (mitochondrial carrier; ornithine transporter) member 2
ENSG00000281181.1	4.98462	-3.07164	0.00875741	0.370117	0.22	0	0	0	CH507-513H4.3	chr21	lincRNA	--
ENSG00000251158.1	4.98462	-3.07164	0.00875741	0.370117	0.05	0	0	0	RP11-98J23.1	chr5	unprocessed_pseudogene	--
ENSG00000271761.1	4.98462	-3.07164	0.00875741	0.370117	0.38	0	0	0	XXbac-BPGBPG55C20.3	chr6	lincRNA	--
ENSG00000183918.14	4.98462	-3.07164	0.00875741	0.370117	0.08	0	0	0	SH2D1A	chrX	protein_coding	SH2 domain containing 1A
ENSG00000233380.1	4.98462	-3.07164	0.00875741	0.370117	0.24	0	0	0	RPS2P48	chr17	processed_pseudogene	ribosomal protein S2 pseudogene 48
ENSG00000154096.13	4.98462	-3.07164	0.00875741	0.370117	0.05	0	0	0	THY1	chr11	protein_coding	Thy-1 cell surface antigen
ENSG00000249978.1	4.98462	-3.07164	0.00875741	0.370117	0.59	0	0	0	TRGV7	chr7	TR_V_pseudogene	T cell receptor gamma variable 7 (pseudogene)
ENSG00000279119.1	4.98462	-3.07164	0.00875741	0.370117	0.57	0	0	0	AC006449.2	chr17	protein_coding	--
ENSG00000164125.15	4.98462	-3.07164	0.00875741	0.370117	0.03	0	0	0	FAM198B	chr4	protein_coding	family with sequence similarity 198, member B
ENSG00000150722.10	4.98304	-3.07247	0.00875741	0.370117	0.06	0.01	0	0	PPP1R1C	chr2	protein_coding	protein phosphatase 1, regulatory (inhibitor) subunit 1C
ENSG00000156299.12	4.98304	-3.07247	0.00875741	0.370117	0.03	0	0	0	TIAM1	chr21	protein_coding	T-cell lymphoma invasion and metastasis 1
ENSG00000260895.1	4.98147	-3.07329	0.00875741	0.370117	0.25	0.07	0	0	RP11-554A11.7	chr11	lincRNA	--
ENSG00000258334.1	4.97832	-3.07493	0.00875741	0.370117	0.02	0.02	0	0	RP11-161H23.9	chr12	antisense	--
ENSG00000257477.1	4.97832	-3.07493	0.00875741	0.370117	0.23	0.2	0	0	LINC01154	chr12	lincRNA	long intergenic non-protein coding RNA 1154
ENSG00000224174.2	4.97517	-3.07657	0.00875741	0.370117	0.16	0.42	0	0	RP4-798A10.4	chr1	lincRNA	--
ENSG00000163564.14	4.9736	-3.07739	0.00875741	0.370117	0.01	0.05	0	0	PYHIN1	chr1	protein_coding	pyrin and HIN domain family, member 1
ENSG00000254859.1	4.9736	-3.07739	0.00875741	0.370117	0.05	0.32	0	0	RP11-661A12.5	chr8	antisense	--
ENSG00000273523.1	4.9736	-3.07739	0.00875741	0.370117	0.01	0.05	0	0	RP11-248G5.9	chr13	antisense	--
ENSG00000230216.1	4.9736	-3.07739	0.00875741	0.370117	0.05	0.29	0	0	HSPB1P2	chrX	processed_pseudogene	heat shock 27kDa protein 1 pseudogene 2
ENSG00000113600.10	4.32895	-1.90467	1.3051e-06	0.00196246	0.18	0.07	0.01	0	C9	chr5	protein_coding	complement component 9
ENSG00000273769.4	4.32895	-1.90467	1.3051e-06	0.00196246	0.35	0.13	0.02	0	LCA10	chrX	processed_transcript	--
ENSG00000142512.14	3.83084	-2.26384	7.2877e-05	0.0371803	0.13	0.01	0.01	0	SIGLEC10	chr19	protein_coding	sialic acid binding Ig-like lectin 10
ENSG00000165887.11	3.66538	-2.3742	0.000232785	0.0658483	0.2	0.09	0.02	0	ANKRD2	chr10	protein_coding	ankyrin repeat domain 2 (stretch responsive muscle)
ENSG00000184860.9	3.66391	-2.37499	0.000416523	0.0917497	0.02	0.01	0	0	SDR42E1	chr16	protein_coding	short chain dehydrogenase/reductase family 42E, member 1
ENSG00000090534.17	3.38915	-2.55078	0.00133473	0.156284	0.13	0.06	0.01	0	THPO	chr3	protein_coding	thrombopoietin
ENSG00000233296.1	3.38352	-2.55413	0.00238861	0.210625	0.07	0.11	0	0.01	AC092159.2	chr2	antisense	--
ENSG00000267724.1	3.37865	-2.55635	0.00238861	0.210625	0.02	0.13	0.01	0	RP11-49K24.8	chr18	antisense	--
ENSG00000206597.1	3.37603	-2.5581	0.00238861	0.210625	0	2.14	0	0.18	SNORA57	chr11	snoRNA	small nucleolar RNA, H/ACA box 57
ENSG00000173769.4	3.29061	-1.995	4.36092e-05	0.0288755	0.03	0.08	0.01	0	TOPAZ1	chr3	protein_coding	testis and ovary specific PAZ domain containing 1
ENSG00000259985.1	3.28501	-2.61427	0.00238861	0.210625	0.2	0.08	0.02	0	RP11-549B18.1	chr18	antisense	--
ENSG00000166341.7	3.28501	-2.61427	0.00238861	0.210625	0.02	0.01	0	0	DCHS1	chr11	protein_coding	dachsous cadherin-related 1
ENSG00000241882.1	3.2748	-2.62004	0.00427103	0.282034	0.1	0.46	0	0.05	RP11-637O11.2	chr3	lincRNA	--
ENSG00000087245.12	3.22806	-2.03918	7.48093e-05	0.0374965	0.02	0.09	0	0.01	MMP2	chr16	protein_coding	matrix metallopeptidase 2
ENSG00000100968.13	3.21772	-1.6216	1.88075e-06	0.00268665	0.05	0.06	0.01	0	NFATC4	chr14	protein_coding	nuclear factor of activated T-cells, cytoplasmic, calcineurin-dependent 4
ENSG00000155622.6	3.1715	-2.68172	0.00427103	0.282034	0.34	0.15	0	0.04	XAGE2	chrX	protein_coding	X antigen family, member 2
ENSG00000245970.2	3.1654	-2.68493	0.00762588	0.366022	0.05	0.09	0	0.01	KB-1208A12.3	chr8	antisense	--
ENSG00000166428.12	3.16502	-2.68476	0.00762588	0.366022	0.02	0.03	0	0	PLD4	chr14	protein_coding	phospholipase D family, member 4
ENSG00000182853.11	3.16502	-2.68476	0.00762588	0.366022	0.13	0.23	0.03	0	VMO1	chr17	protein_coding	vitelline membrane outer layer 1 homolog (chicken)
ENSG00000270040.1	3.16388	-2.68573	0.00762588	0.366022	0.17	0.46	0	0.06	RP11-416A14.1	chr1	sense_intronic	--
ENSG00000159784.17	3.16388	-2.68573	0.00762588	0.366022	0.01	0.03	0	0	FAM131B	chr7	protein_coding	family with sequence similarity 131, member B
ENSG00000152495.10	3.16084	-2.68734	0.00762588	0.366022	0	0.02	0	0	CAMK4	chr5	protein_coding	calcium/calmodulin-dependent protein kinase IV
ENSG00000279476.1	3.05415	-2.74904	0.00762588	0.366022	0.1	0	0	0.01	RP11-391L3.3	chr16	TEC	--
ENSG00000243389.1	3.05223	-2.74968	0.00762588	0.366022	0.61	0.05	0.06	0	AC012442.5	chr2	3prime_overlapping_ncrna	--
ENSG00000226864.1	3.04798	-2.75227	0.00762588	0.366022	0.19	0.1	0	0.03	ATE1-AS1	chr10	antisense	ATE1 antisense RNA 1
ENSG00000282021.1	3.04798	-2.75227	0.00762588	0.366022	0.08	0.04	0	0.01	CTD-2336O2.3	chr8	lincRNA	--
ENSG00000279147.1	3.0476	-2.7521	0.00762588	0.366022	0.1	0.05	0.01	0	RP11-271K21.12	chr3	TEC	--
ENSG00000267015.1	3.0476	-2.7521	0.00762588	0.366022	0.36	0.18	0.05	0	RP11-800A18.4	chr18	antisense	--
ENSG00000218208.1	3.04644	-2.75308	0.00762588	0.366022	0.35	0.25	0	0.06	RP11-367G18.2	chr6	processed_pseudogene	--
ENSG00000134376.14	3.04606	-2.75291	0.00762588	0.366022	0.01	0.01	0	0	CRB1	chr1	protein_coding	crumbs family member 1, photoreceptor morphogenesis associated
ENSG00000254362.1	3.04606	-2.75291	0.00762588	0.366022	0.27	0.2	0.05	0	RP11-14I17.3	chr8	sense_intronic	--
ENSG00000236305.1	3.0449	-2.75389	0.00762588	0.366022	0.35	0.37	0	0.07	RP11-126L15.4	chr7	antisense	--
ENSG00000141506.13	3.03602	-2.1717	0.000377221	0.0862177	0.05	0.06	0.01	0.01	PIK3R5	chr17	protein_coding	phosphoinositide-3-kinase, regulatory subunit 5
ENSG00000282012.1	3.03315	-2.17325	0.000377221	0.0862177	0.26	0.53	0.05	0.04	LL22NC03-N95F10.1	chr22	lincRNA	--
ENSG00000272273.1	2.97274	-2.21551	0.000377221	0.0862177	0.69	0.22	0	0.1	XXbac-BPG252P9.10	chr6	antisense	--
ENSG00000124678.17	2.96185	-2.22062	0.000645992	0.107302	0.07	0.1	0.02	0	TCP11	chr6	protein_coding	t-complex 11, testis-specific
ENSG00000128346.10	2.89267	-1.86171	3.98599e-05	0.0288755	0.27	0.04	0.03	0.01	C22orf23	chr22	protein_coding	chromosome 22 open reading frame 23
ENSG00000134242.15	2.82802	-1.90608	0.000110192	0.0443406	0.1	0.06	0.01	0.01	PTPN22	chr1	protein_coding	protein tyrosine phosphatase, non-receptor type 22 (lymphoid)
ENSG00000165899.10	2.827	-1.90699	0.000110192	0.0443406	0.04	0.03	0	0.01	OTOGL	chr12	protein_coding	otogelin-like
ENSG00000131386.17	2.80686	-2.32189	0.00188642	0.196697	0.04	0.04	0.01	0.01	GALNT15	chr3	protein_coding	polypeptide N-acetylgalactosaminyltransferase 15
ENSG00000150201.14	2.78941	-1.35997	5.6398e-06	0.00619727	0.28	0.85	0.1	0.06	FXYD4	chr10	protein_coding	FXYD domain containing ion transport regulator 4
ENSG00000170873.18	2.72925	-2.37195	0.00188642	0.196697	0.06	0.01	0	0.01	MTSS1	chr8	protein_coding	metastasis suppressor 1
ENSG00000279587.1	2.71002	-2.38217	0.0032136	0.246146	0	0.35	0	0.05	RP1-278D1.2	chrX	TEC	--
ENSG00000169508.6	2.68034	-1.44294	6.77732e-06	0.00708409	0.14	0.37	0	0.08	GPR183	chr13	protein_coding	G protein-coupled receptor 183
ENSG00000108576.9	2.63957	-2.42694	0.0032136	0.246146	0.05	0	0	0	SLC6A4	chr17	protein_coding	solute carrier family 6 (neurotransmitter transporter), member 4
ENSG00000121270.15	2.63816	-2.03531	0.000502969	0.0962496	0.04	0.06	0	0.02	ABCC11	chr16	protein_coding	ATP-binding cassette, sub-family C (CFTR/MRP), member 11
ENSG00000227811.2	2.63459	-2.03652	0.000502969	0.0962496	0.07	0.17	0.03	0.01	FAM212B-AS1	chr1	antisense	FAM212B antisense RNA 1
ENSG00000091129.19	2.62799	-2.43343	0.00545873	0.313795	0.02	0.03	0	0.01	NRCAM	chr7	protein_coding	neuronal cell adhesion molecule
ENSG00000279499.1	2.62575	-2.43389	0.00545873	0.313795	0.3	0.52	0.12	0	RP11-490N5.3	chr13	TEC	--
ENSG00000281887.2	2.62501	-2.43501	0.00545873	0.313795	0.05	0.11	0	0.02	GIMAP1-GIMAP5	chr7	protein_coding	GIMAP1-GIMAP5 readthrough
ENSG00000275476.1	2.59943	-1.75547	8.84899e-05	0.0414452	0.8	0.61	0.11	0.11	RP11-996F15.4	chr12	antisense	--
ENSG00000125510.15	2.59462	-1.75738	8.84899e-05	0.0414452	0.09	0.1	0.03	0	OPRL1	chr20	protein_coding	opiate receptor-like 1
ENSG00000128254.12	2.58569	-2.07096	0.000502969	0.0962496	0.37	0.05	0.07	0	C22orf24	chr22	processed_transcript	chromosome 22 open reading frame 24
ENSG00000227382.1	2.58282	-2.07249	0.000502969	0.0962496	0.39	0.11	0.08	0	EIF4A2P2	chr10	processed_pseudogene	eukaryotic translation initiation factor 4A2 pseudogene 2
ENSG00000107187.15	2.55224	-1.78917	0.000143223	0.0511486	0.15	0.07	0.02	0.02	LHX3	chr9	protein_coding	LIM homeobox 3
ENSG00000236155.6	2.52192	-2.49646	0.00923878	0.372813	0	0.1	0	0.02	RP11-231P20.2	chr1	transcribed_unprocessed_pseudogene	--
ENSG00000197245.4	2.52155	-2.49629	0.00923878	0.372813	0	0.21	0.02	0.02	FAM110D	chr1	protein_coding	family with sequence similarity 110, member D
ENSG00000133475.16	2.48348	-1.83413	0.000231501	0.0658483	0.08	0.18	0.03	0.01	GGT2	chr22	protein_coding	gamma-glutamyltransferase 2
ENSG00000167755.13	2.48174	-1.83472	0.000231501	0.0658483	0.08	0.23	0.06	0	KLK6	chr19	protein_coding	kallikrein-related peptidase 6
ENSG00000278472.1	2.43698	-2.54674	0.00923878	0.372813	0.74	0	0.06	0.06	RP11-74D7.3	chr15	sense_intronic	--
ENSG00000275902.1	2.43324	-1.86887	0.000373585	0.0862177	0.41	0.46	0.16	0	RP13-1032I1.11	chr17	antisense	--
ENSG00000166736.11	2.43128	-2.55009	0.00923878	0.372813	0.09	0.03	0	0.02	HTR3A	chr11	protein_coding	5-hydroxytryptamine (serotonin) receptor 3A, ionotropic
ENSG00000269038.1	2.42939	-2.55072	0.00923878	0.372813	0.46	0.25	0.06	0.06	AP001462.6	chr11	lincRNA	--
ENSG00000253667.2	2.42825	-2.55169	0.00923878	0.372813	0.07	0.06	0	0.02	RP11-30L15.4	chr8	processed_pseudogene	--
ENSG00000253264.1	2.36454	-2.21358	0.00225862	0.210625	0.68	0.12	0.1	0.05	PCAT2	chr8	lincRNA	prostate cancer associated transcript 2 (non-protein coding)
ENSG00000183395.4	2.35505	-2.21935	0.0037051	0.268667	0.27	0.3	0	0.1	PMCH	chr12	protein_coding	pro-melanin-concentrating hormone
ENSG00000271757.1	2.34848	-2.22212	0.0037051	0.268667	0.15	0.45	0.08	0.04	RP11-111M22.5	chr11	lincRNA	--
ENSG00000269296.1	2.34656	-1.68412	0.000171857	0.0556716	0.12	0.07	0.01	0.03	AC005614.3	chr19	antisense	--
ENSG00000184368.15	2.32192	-1.94515	0.000966912	0.141665	0.09	0.04	0.01	0.01	MAP7D2	chrX	protein_coding	MAP7 domain containing 2
ENSG00000258402.1	2.32014	-1.94575	0.000966912	0.141665	0.7	0.39	0.16	0.05	RP11-516J2.1	chr14	lincRNA	--
ENSG00000173110.7	2.29139	2.33887	7.61841e-22	5.44145e-18	4.21	1.76	0.47	0.75	HSPA6	chr1	protein_coding	heat shock 70kDa protein 6 (HSP70B')
ENSG00000186088.15	2.28628	-2.26311	0.0037051	0.268667	0.11	0.01	0	0.02	GSAP	chr7	protein_coding	gamma-secretase activating protein
ENSG00000175538.10	2.2789	-2.26702	0.0037051	0.268667	0.08	0.04	0	0.02	KCNE3	chr11	protein_coding	potassium channel, voltage gated subfamily E regulatory beta subunit 3
ENSG00000259425.5	2.2675	-2.27199	0.00605474	0.328243	0.08	0.22	0.06	0	RP11-566K19.5	chr15	transcribed_unprocessed_pseudogene	--
ENSG00000137285.9	2.2576	-1.35393	0.000100503	0.0443406	0.19	0.26	0.07	0.03	TUBB2B	chr6	protein_coding	tubulin, beta 2B class IIb
ENSG00000281379.2	2.25497	-1.98865	0.00154961	0.173617	0.49	0.36	0.09	0.08	SEPT14P19	chr19	transcribed_unprocessed_pseudogene	septin 14 pseudogene 19
ENSG00000205537.2	2.19836	-2.31523	0.00605474	0.328243	0.3	0.02	0.06	0	RP11-89H19.1	chr12	antisense	--
ENSG00000087116.13	2.19687	-2.31602	0.00605474	0.328243	0.05	0.01	0.01	0	ADAMTS2	chr5	protein_coding	ADAM metallopeptidase with thrombospondin type 1 motif, 2
ENSG00000234999.1	2.19464	-2.31792	0.00605474	0.328243	0.68	0.2	0.06	0.12	SNRPCP19	chr7	processed_pseudogene	small nuclear ribonucleoprotein polypeptide C pseudogene 19
ENSG00000163016.9	2.18945	-2.31994	0.00984947	0.379367	0.14	0.1	0.05	0	ALMS1P	chr2	transcribed_unprocessed_pseudogene	Alstrom syndrome 1 pseudogene
ENSG00000279031.1	2.18612	-2.32278	0.00984947	0.379367	0.3	0.43	0	0.15	LA16c-360H6.1	chr16	TEC	--
ENSG00000267943.1	2.18205	-2.32386	0.00984947	0.379367	0.03	0.07	0.02	0	CTD-2620I22.3	chr19	lincRNA	--
ENSG00000280311.1	2.13722	-1.82615	0.00105559	0.15004	0.45	0.19	0.03	0.11	RP13-554M15.5	chr12	TEC	--
ENSG00000261485.1	2.10608	-2.36983	0.00984947	0.379367	0.27	0.02	0.06	0	PAN3-AS1	chr13	antisense	PAN3 antisense RNA 1
ENSG00000183397.5	2.10233	-2.37252	0.00984947	0.379367	0.42	0.13	0.04	0.08	C19orf71	chr19	protein_coding	chromosome 19 open reading frame 71
ENSG00000137265.14	2.0428	-2.12335	0.00624639	0.329261	0.04	0.05	0.01	0.01	IRF4	chr6	protein_coding	interferon regulatory factor 4
ENSG00000105427.9	2.03563	-1.68849	0.000719455	0.116195	0.43	0.68	0.05	0.22	CNFN	chr19	protein_coding	cornifelin
ENSG00000229867.1	2.01646	-1.9043	0.00257381	0.214182	0.12	0.06	0.02	0.02	STEAP3-AS1	chr2	antisense	STEAP3 antisense RNA 1
ENSG00000267909.2	2.00172	-1.91292	0.00257381	0.214182	0.03	0.1	0	0.03	CCDC177	chr14	protein_coding	coiled-coil domain containing 177
ENSG00000172296.12	1.99715	-1.91502	0.00399692	0.279668	0	0.08	0	0.02	SPTLC3	chr20	protein_coding	serine palmitoyltransferase, long chain base subunit 3
ENSG00000242396.1	1.99198	-1.38269	0.000512074	0.0962496	0.54	0.95	0.1	0.28	RP11-67L3.5	chr1	antisense	--
ENSG00000183549.10	1.96984	-2.16866	0.00985266	0.379367	0.07	0.05	0	0.03	ACSM5	chr16	protein_coding	acyl-CoA synthetase medium-chain family member 5
ENSG00000243650.3	1.96837	-2.16801	0.00985266	0.379367	0.91	0.64	0.38	0	RN7SL834P	chr2	misc_RNA	RNA, 7SL, cytoplasmic 834, pseudogene
ENSG00000279589.1	1.96691	-2.16879	0.00985266	0.379367	0.2	0.17	0.09	0	RP11-454F8.4	chr16	TEC	--
ENSG00000264895.1	1.96656	-2.17005	0.00985266	0.379367	0.1	0.1	0.01	0.04	RP11-421E14.2	chr17	sense_intronic	--
ENSG00000271869.1	1.96073	-2.17314	0.00985266	0.379367	0.26	0.79	0.07	0.2	RP11-51J9.5	chr8	lincRNA	--
ENSG00000186847.5	1.95782	-1.26619	0.000240604	0.0667383	0.42	0.16	0.08	0.06	KRT14	chr17	protein_coding	keratin 14, type I
ENSG00000245573.7	1.95703	-1.40717	0.000512074	0.0962496	0.13	0.14	0.03	0.04	BDNF-AS	chr11	antisense	BDNF antisense RNA
ENSG00000125726.10	1.95493	-2.17623	0.00985266	0.379367	0	0.34	0.02	0.07	CD70	chr19	protein_coding	CD70 molecule
ENSG00000213976.4	1.9545	-1.94466	0.00399692	0.279668	0.22	0.09	0	0.08	CTD-2561J22.2	chr19	unprocessed_pseudogene	--
ENSG00000270010.1	1.93613	-1.75462	0.00169395	0.183318	0.72	0.54	0.11	0.21	CTD-2132N18.4	chr17	sense_intronic	--
ENSG00000189001.10	1.92876	-1.5837	0.00166269	0.182004	0.24	0.14	0.04	0.05	SBSN	chr19	protein_coding	suprabasin
ENSG00000198729.4	1.90489	-0.582928	4.57667e-06	0.00523022	0.54	0.22	0.05	0.15	PPP1R14C	chr6	protein_coding	protein phosphatase 1, regulatory (inhibitor) subunit 14C
ENSG00000233885.7	1.89483	-2.21369	0.00985266	0.379367	0.15	0.03	0.01	0.03	YEATS2-AS1	chr3	antisense	YEATS2 antisense RNA 1
ENSG00000225541.1	1.89225	-2.21397	0.00985266	0.379367	0.26	0.07	0.09	0	AC002480.5	chr7	sense_overlapping	--
ENSG00000267898.1	1.88673	-1.61277	0.0011254	0.150093	0.7	0.19	0.07	0.16	CTD-2639E6.9	chr19	lincRNA	--
ENSG00000120457.11	1.88316	-1.98752	0.00617992	0.328585	0.05	0.03	0.02	0	KCNJ5	chr11	protein_coding	potassium channel, inwardly rectifying subfamily J, member 5
ENSG00000273173.5	1.88114	-1.79072	0.00258638	0.214182	0.53	0.37	0.04	0.19	SNURF	chr15	protein_coding	SNRPN upstream reading frame
ENSG00000115488.3	1.88033	-1.99044	0.00617992	0.328585	0.2	0.24	0	0.12	NEU2	chr2	protein_coding	sialidase 2 (cytosolic sialidase)
ENSG00000117643.14	1.87854	-1.99104	0.00617992	0.328585	0.04	0.06	0.01	0.02	MAN1C1	chr1	protein_coding	mannosidase, alpha, class 1C, member 1
ENSG00000272950.1	1.87675	-1.99164	0.00617992	0.328585	0.31	0.55	0.09	0.14	RP11-307C18.1	chr7	antisense	--
ENSG00000101638.13	1.84271	-1.34665	0.000740212	0.118144	0.04	0.02	0	0.02	ST8SIA5	chr18	protein_coding	ST8 alpha-N-acetyl-neuraminide alpha-2,8-sialyltransferase 5
ENSG00000198771.10	1.82911	-1.82321	0.00258638	0.214182	0.16	0.04	0.04	0.01	RCSD1	chr1	protein_coding	RCSD domain containing 1
ENSG00000271021.1	1.81894	-1.82831	0.00393375	0.278682	0.67	0.59	0.36	0	RP5-878I13.2	chrX	processed_pseudogene	--
ENSG00000162490.6	1.81687	-2.02829	0.00617992	0.328585	0.05	0.02	0.02	0	DRAXIN	chr1	protein_coding	dorsal inhibitory axon guidance protein
ENSG00000243501.5	1.81652	-2.02954	0.00950807	0.376762	0.21	0.1	0.03	0.05	RP11-257K9.8	chr6	protein_coding	--
ENSG00000278891.1	1.81136	-1.65794	0.00529094	0.311033	0.04	0.19	0.06	0.01	RP11-246E12.2	chr18	TEC	--
ENSG00000183682.7	1.80933	-2.03336	0.00950807	0.376762	0.12	0.16	0.03	0.05	BMP8A	chr1	protein_coding	bone morphogenetic protein 8a
ENSG00000124900.12	1.80572	-2.03457	0.00950807	0.376762	0.08	0.17	0.06	0.01	TRIM51	chr11	protein_coding	tripartite motif-containing 51
ENSG00000178404.9	1.77237	-0.759499	4.41495e-05	0.0288755	0.35	0.32	0.04	0.15	CEP295NL	chr17	protein_coding	CEP295 N-terminal like
ENSG00000251000.1	1.75502	-1.86861	0.0059572	0.327933	0.56	0.76	0.33	0.06	AC008592.3	chr5	processed_pseudogene	--
ENSG00000149201.9	1.74957	-1.16531	0.000491309	0.0962496	0.26	0.09	0.05	0.05	CCDC81	chr11	protein_coding	coiled-coil domain containing 81
ENSG00000224805.2	1.74494	-2.07223	0.00950807	0.376762	0.55	0.17	0.17	0.04	LINC00853	chr1	antisense	long intergenic non-protein coding RNA 853
ENSG00000268650.3	1.74449	-1.40997	0.00222311	0.210625	0.26	0.47	0.07	0.14	AC068499.10	chr19	antisense	--
ENSG00000054356.13	1.73283	-1.55687	0.00340391	0.25592	0.07	0.11	0.02	0.03	PTPRN	chr2	protein_coding	protein tyrosine phosphatase, receptor type, N
ENSG00000271789.1	1.71483	-1.72112	0.00771681	0.368062	0.19	0.26	0.12	0.02	RP5-1112D6.7	chr6	lincRNA	--
ENSG00000171931.12	1.68562	0.179496	3.16184e-07	0.000694875	0.51	0.28	0.14	0.11	FBXW10	chr17	protein_coding	F-box and WD repeat domain containing 10
ENSG00000269096.6	1.68317	-1.58725	0.0049199	0.294062	0.24	0.35	0.19	0	CT45A3	chrX	protein_coding	cancer/testis antigen family 45, member A3
ENSG00000224479.5	1.68218	-1.58814	0.0049199	0.294062	0.11	0.18	0.08	0.01	AC136289.1	chr3	transcribed_unprocessed_pseudogene	--
ENSG00000230583.6	1.66887	-1.75218	0.00564613	0.32015	0.15	0.08	0.03	0.04	GTF2IRD1P1	chr7	transcribed_unprocessed_pseudogene	GTF2I repeat domain containing 1 pseudogene 1
ENSG00000278998.1	1.64145	-1.35151	0.00296887	0.238931	0.41	0.48	0.17	0.11	RP11-1430O6.1	chr7	TEC	--
ENSG00000182489.8	1.64022	-1.94109	0.0089778	0.372813	0.14	0.02	0.02	0.02	XKRX	chrX	protein_coding	XK, Kell blood group complex subunit-related, X-linked
ENSG00000227536.1	1.63951	-1.94217	0.0089778	0.372813	0.28	0.06	0.02	0.08	SOCS5P4	chrX	processed_pseudogene	suppressor of cytokine signaling 5 pseudogene 4
ENSG00000234880.1	1.62001	-1.1433	0.000940595	0.140695	0.31	0.16	0.13	0.02	LINC00163	chr21	lincRNA	long intergenic non-protein coding RNA 163
ENSG00000228933.7	1.60773	-1.49955	0.0064723	0.336819	0.06	0.2	0.02	0.07	RP11-268G12.1	chrX	lincRNA	--
ENSG00000204389.9	1.59859	6.78707	1.44054e-16	5.87947e-13	74.35	39.86	20.15	17.98	HSPA1A	chr6	protein_coding	heat shock 70kDa protein 1A
ENSG00000223198.1	1.59731	-1.79557	0.00836086	0.370117	0.73	1.93	0.39	0.5	RNU2-22P	chr2	snRNA	RNA, U2 small nuclear 22, pseudogene
ENSG00000181444.12	1.5753	-1.1734	0.00183579	0.194253	0.16	0.19	0.06	0.06	ZNF467	chr7	protein_coding	zinc finger protein 467
ENSG00000276995.1	1.57486	-1.39632	0.00296887	0.238931	1.54	0.24	0.47	0.11	RP11-321A17.6	chr17	lincRNA	--
ENSG00000162771.7	1.55859	-0.908138	0.000582131	0.105933	0.3	0.22	0.04	0.14	FAM71A	chr1	protein_coding	family with sequence similarity 71, member A
ENSG00000141314.12	1.52382	-1.55258	0.00916468	0.372813	0.08	0.07	0.04	0.01	RHBDL3	chr17	protein_coding	rhomboid, veinlet-like 3 (Drosophila)
ENSG00000223692.1	1.52083	-1.55522	0.00916468	0.372813	0.73	0.9	0.26	0.31	DIP2A-IT1	chr21	sense_intronic	DIP2A intronic transcript 1
ENSG00000185614.4	1.52071	-1.10915	0.00236137	0.210625	0.22	0.72	0.18	0.15	FAM212A	chr3	protein_coding	family with sequence similarity 212, member A
ENSG00000276317.1	1.50918	-0.780794	0.000523359	0.0977278	0.85	1.26	0.18	0.56	RP11-93B14.10	chr20	antisense	--
ENSG00000228989.1	1.50163	-1.12353	0.00236137	0.210625	1.31	1.1	0.46	0.38	AC133528.2	chr2	antisense	--
ENSG00000261575.2	1.50055	-1.4431	0.00827091	0.370117	0.12	0.98	0.08	0.32	RP11-259G18.1	chr17	transcribed_unprocessed_pseudogene	--
ENSG00000220842.6	1.47779	-1.58391	0.00708069	0.358494	0.86	0.56	0.06	0.44	RP11-572P18.1	chr10	processed_pseudogene	--
ENSG00000279419.1	1.40607	-0.296372	0.000178199	0.0559468	0.41	0.28	0.14	0.12	RP5-907C10.3	chr7	TEC	--
ENSG00000185634.11	1.40324	-0.580784	0.000417482	0.0917497	0.19	0.08	0.04	0.06	SHC4	chr15	protein_coding	SHC (Src homology 2 domain containing) family, member 4
ENSG00000234705.1	1.39085	-1.29413	0.00673182	0.349053	1.55	1.02	0.49	0.48	HMGA1P4	chr9	antisense	high mobility group AT-hook 1 pseudogene 4
ENSG00000236778.7	1.38831	-0.653628	0.000586605	0.106071	0.34	0.3	0.07	0.17	INTS6-AS1	chr13	antisense	INTS6 antisense RNA 1
ENSG00000261787.1	1.38825	-1.29554	0.00673182	0.349053	0.19	0.16	0.07	0.07	TCF24	chr8	protein_coding	transcription factor 24
ENSG00000263004.1	1.38635	-1.02078	0.00368719	0.268667	0.36	1.08	0.12	0.45	RP11-166P13.3	chr17	lincRNA	--
ENSG00000260526.1	1.38055	-1.30105	0.00922886	0.372813	0.14	0.27	0.03	0.13	RP11-73K9.2	chr4	antisense	--
ENSG00000223361.5	1.37046	2.99202	1.3963e-10	4.98654e-07	11.13	9.75	2.74	5.41	FTH1P10	chr5	transcribed_processed_pseudogene	ferritin, heavy polypeptide 1 pseudogene 10
ENSG00000234509.1	1.35678	-1.03842	0.00368719	0.268667	0.16	0.3	0.11	0.07	AP000253.1	chr21	lincRNA	--
ENSG00000214146.2	1.35393	-1.12915	0.0054903	0.31473	0.14	0.26	0.01	0.15	RP11-699L21.1	chr3	lincRNA	--
ENSG00000113578.17	1.34916	-0.615687	0.00072579	0.116493	0.19	0.1	0.06	0.05	FGF1	chr5	protein_coding	fibroblast growth factor 1 (acidic)
ENSG00000060982.14	1.34641	-1.32232	0.00922886	0.372813	0.04	0.04	0.01	0.02	BCAT1	chr12	protein_coding	branched chain amino-acid transaminase 1, cytosolic
ENSG00000120156.20	1.32842	-1.05597	0.00496536	0.295543	0.1	0.11	0.07	0.01	TEK	chr9	protein_coding	TEK tyrosine kinase, endothelial
ENSG00000251259.1	1.30801	-0.312695	0.000456473	0.0962496	1.7	1.57	0.65	0.68	AC004069.2	chr4	lincRNA	--
ENSG00000138030.12	1.26916	-1.01699	0.0059972	0.328238	0.15	0.25	0.01	0.16	KHK	chr2	protein_coding	ketohexokinase (fructokinase)
ENSG00000074966.10	1.25376	-0.807439	0.00336386	0.254247	0.27	0.15	0.09	0.08	TXK	chr4	protein_coding	TXK tyrosine kinase
ENSG00000253917.4	1.25201	-0.742567	0.00306241	0.242812	0.8	1.07	0.28	0.51	AC226119.5	chr4	processed_transcript	--
ENSG00000206885.1	1.2481	-1.10726	0.008912	0.372813	1.7	5.14	2	0.97	SNORA75	chr2	snoRNA	small nucleolar RNA, H/ACA box 75
ENSG00000164400.5	1.23778	-0.960469	0.00540599	0.313795	1.15	0.26	0.28	0.3	CSF2	chr5	protein_coding	colony stimulating factor 2 (granulocyte-macrophage)
ENSG00000255100.1	1.23761	-0.308886	0.00111012	0.150093	1.47	3.72	1.3	0.95	RP11-21L23.3	chr11	antisense	--
ENSG00000226754.1	1.2324	-0.755083	0.00306241	0.242812	0.62	0.46	0.23	0.23	RP5-1024G6.5	chr1	antisense	--
ENSG00000220702.1	1.22538	-0.522314	0.00195704	0.198822	1.46	1.05	0.63	0.44	RP1-32I10.10	chr22	lincRNA	--
ENSG00000188603.16	1.21665	-0.898431	0.00641974	0.335305	0.08	0.36	0.09	0.11	CLN3	chr16	protein_coding	ceroid-lipofuscinosis, neuronal 3
ENSG00000273156.1	1.21395	-1.05026	0.00797283	0.370117	1.05	0.48	0.41	0.24	RP11-127B20.2	chr4	lincRNA	--
ENSG00000124116.18	1.18524	0.166799	0.000199364	0.0612455	1.21	1.08	0.6	0.42	WFDC3	chr20	protein_coding	WAP four-disulfide core domain 3
ENSG00000149968.11	1.17829	-0.856325	0.00441498	0.282034	0.53	0.07	0.16	0.09	MMP3	chr11	protein_coding	matrix metallopeptidase 3
ENSG00000123342.15	1.174	0.0546254	0.000358175	0.0852754	0.64	0.35	0.23	0.2	MMP19	chr12	protein_coding	matrix metallopeptidase 19
ENSG00000183018.8	1.16956	0.0478287	0.000358175	0.0852754	0.5	0.18	0.08	0.22	SPNS2	chr17	protein_coding	spinster homolog 2 (Drosophila)
ENSG00000219023.1	1.16706	1.48006	3.02735e-06	0.00396196	8.14	8.24	3.21	4.14	RP3-340B19.2	chr6	processed_pseudogene	--
ENSG00000232472.1	1.13176	0.0249132	0.000667544	0.109608	1.61	1.68	0.4	1.1	EEF1B2P3	chrX	processed_pseudogene	eukaryotic translation elongation factor 1 beta 2 pseudogene 3
ENSG00000218175.2	1.12523	0.79843	6.5476e-05	0.035074	5.94	5.4	2.3	2.93	AC016739.2	chr2	processed_pseudogene	--
ENSG00000188107.13	1.12071	-0.762894	0.00785119	0.370117	0.03	0.06	0.02	0.02	EYS	chr6	protein_coding	eyes shut homolog (Drosophila)
ENSG00000171450.5	1.09654	-0.720146	0.00704999	0.358494	0.28	0.23	0.08	0.16	CDK5R2	chr2	protein_coding	cyclin-dependent kinase 5, regulatory subunit 2 (p39)
ENSG00000239559.2	1.08052	-0.672275	0.00809647	0.370117	1.99	2.53	0.67	1.48	RPL37P2	chr11	processed_pseudogene	ribosomal protein L37 pseudogene 2
ENSG00000247121.6	1.07852	-0.371313	0.00400364	0.279668	0.53	0.21	0.12	0.23	CTD-2260A17.2	chr5	antisense	--
ENSG00000244398.1	1.07378	0.92031	8.69488e-05	0.0414452	6.71	6.45	2.64	3.65	RP11-466H18.1	chr11	processed_pseudogene	--
ENSG00000261533.2	1.0736	-0.123388	0.00191146	0.197149	0.54	0.38	0.15	0.28	RP11-15N24.4	chr3	sense_overlapping	--
ENSG00000144583.4	1.07085	1.00889	6.01058e-05	0.033671	0.96	0.07	0.32	0.17	2020-03-04	chr2	protein_coding	membrane-associated ring finger (C3HC4) 4, E3 ubiquitin protein ligase
ENSG00000278023.4	1.05963	0.116036	0.00111523	0.150093	0.55	0.63	0.29	0.28	RDM1	chr17	protein_coding	RAD52 motif containing 1
ENSG00000102981.9	1.05455	0.0802094	0.00145644	0.166442	0.62	1.17	0.39	0.48	PARD6A	chr16	protein_coding	par-6 family cell polarity regulator alpha
ENSG00000269107.1	1.05093	-0.211946	0.00343979	0.257939	1.4	1.78	1.1	0.46	RP11-15H20.7	chr19	lincRNA	--
ENSG00000233762.3	1.04779	0.766026	0.000165139	0.0543928	4.18	4.22	1.41	2.68	AC007969.5	chr2	processed_pseudogene	--
ENSG00000204584.1	1.04454	-0.139515	0.00235038	0.210625	0.67	0.27	0.3	0.15	RP11-304F15.3	chr17	antisense	--
ENSG00000248257.7	1.04105	-0.437785	0.00549886	0.31473	0.68	0.19	0.33	0.09	PSG10P	chr19	transcribed_unprocessed_pseudogene	pregnancy specific beta-1-glycoprotein 10, pseudogene
ENSG00000120693.13	1.04075	-0.305697	0.00510627	0.301418	0.11	0.2	0.04	0.11	SMAD9	chr13	protein_coding	SMAD family member 9
ENSG00000223551.1	1.04071	0.958956	0.000149459	0.0520737	3.32	3.64	2.48	0.95	TMSB4XP4	chr9	processed_pseudogene	thymosin beta 4, X-linked pseudogene 4
ENSG00000136149.6	1.0378	0.719244	0.000247159	0.0678973	2.67	3.23	1.12	1.78	RPL13AP25	chr13	processed_pseudogene	ribosomal protein L13a pseudogene 25
ENSG00000238164.6	1.02476	0.0918961	0.00135104	0.157548	0.29	0.09	0.1	0.08	RP3-395M20.8	chr1	antisense	--
ENSG00000110876.9	1.02437	0.507058	0.000555677	0.103089	0.75	0.5	0.23	0.38	SELPLG	chr12	protein_coding	selectin P ligand
ENSG00000164385.8	1.0226	-0.651864	0.00922818	0.372813	0.28	0.26	0.15	0.12	LINC01600	chr6	lincRNA	long intergenic non-protein coding RNA 1600
ENSG00000213937.3	1.00753	-0.369829	0.00859106	0.370117	0.32	0.47	0.13	0.26	CLDN9	chr16	protein_coding	claudin 9
ENSG00000188760.10	1.00676	-0.164375	0.00432728	0.282034	0.32	0.41	0.16	0.21	TMEM198	chr2	protein_coding	transmembrane protein 198
ENSG00000204388.6	1.00388	6.4034	1.51852e-07	0.000433842	46.21	30.33	18.83	19.75	HSPA1B	chr6	protein_coding	heat shock 70kDa protein 1B
ENSG00000274964.1	-1.00818	0.579797	0.000440811	0.0951204	0.54	0.67	1.19	1.27	RP11-817I4.1	chr12	sense_intronic	--
ENSG00000234797.5	-1.01384	1.27476	6.50772e-05	0.035074	1.7	1.69	2.76	4.15	RPS3AP6	chr15	processed_pseudogene	ribosomal protein S3A pseudogene 6
ENSG00000135077.8	-1.01708	-0.0442001	0.0022427	0.210625	0.15	0.2	0.35	0.38	HAVCR2	chr5	protein_coding	hepatitis A virus cellular receptor 2
ENSG00000203819.6	-1.02256	0.162106	0.00130716	0.156284	0.81	1.25	2.08	2.2	HIST2H2BC	chr1	processed_pseudogene	histone cluster 2, H2bc (pseudogene)
ENSG00000264885.1	-1.02258	0.222195	0.00113286	0.150093	0.34	0.35	0.76	0.65	RP11-815I9.4	chr17	sense_intronic	--
ENSG00000276449.1	-1.02535	0.0190474	0.00157205	0.175443	0.12	0.21	0.28	0.39	AC004076.5	chr19	antisense	--
ENSG00000198963.10	-1.02779	0.856022	0.000146093	0.0515295	0.06	0.15	0.2	0.23	RORB	chr9	protein_coding	RAR-related orphan receptor B
ENSG00000197837.3	-1.03308	-0.610796	0.00828475	0.370117	0.36	0.79	1.09	1.34	HIST4H4	chr12	protein_coding	histone cluster 4, H4
ENSG00000278916.1	-1.04365	-0.378953	0.00400364	0.279668	0.17	0.16	0.33	0.34	CEP83-AS1	chr12	lincRNA	CEP83 antisense RNA 1 (head to head)
ENSG00000162482.4	-1.05095	-0.0545103	0.00132805	0.156284	0.26	0.33	0.64	0.61	AKR7A3	chr1	protein_coding	aldo-keto reductase family 7, member A3 (aflatoxin aldehyde reductase)
ENSG00000229153.5	-1.05137	-0.518782	0.00468196	0.289532	0.01	0.13	0.16	0.14	EPHA1-AS1	chr7	antisense	EPHA1 antisense RNA 1
ENSG00000273271.1	-1.05148	-0.296952	0.00333028	0.253048	0.8	0.83	1.9	1.54	AP000254.8	chr21	antisense	--
ENSG00000203872.6	-1.05611	-0.298332	0.00333028	0.253048	0.13	0.19	0.41	0.27	C6orf163	chr6	protein_coding	chromosome 6 open reading frame 163
ENSG00000196993.8	-1.06022	-0.221	0.00278889	0.228305	0.17	0.25	0.49	0.4	NPIPB9	chr16	protein_coding	nuclear pore complex interacting protein family, member B9
ENSG00000279342.1	-1.06073	0.721513	0.000155324	0.0534653	0.69	1.43	2.32	2.22	AP000866.1	chr11	protein_coding	--
ENSG00000163406.10	-1.06304	0.163132	0.000800278	0.12494	0.09	0.12	0.19	0.25	SLC15A2	chr3	protein_coding	solute carrier family 15 (oligopeptide transporter), member 2
ENSG00000143387.12	-1.07115	0.0873472	0.00111523	0.150093	0.35	0.31	0.76	0.64	CTSK	chr1	protein_coding	cathepsin K
ENSG00000271576.1	-1.07451	-0.78425	0.00785119	0.370117	0.13	0.23	0.32	0.45	RP11-486G15.2	chr1	lincRNA	--
ENSG00000267248.1	-1.07873	-0.624382	0.00572168	0.32306	0.4	0.43	0.77	1.02	CTD-2319I12.4	chr17	processed_transcript	--
ENSG00000249464.5	-1.07922	-0.784568	0.00785119	0.370117	0.02	0.05	0.09	0.07	LINC01091	chr4	lincRNA	long intergenic non-protein coding RNA 1091
ENSG00000214184.3	-1.08036	-0.624876	0.00572168	0.32306	0.36	0.46	0.79	0.97	GCC2-AS1	chr2	antisense	GCC2 antisense RNA 1
ENSG00000177138.15	-1.09251	0.0672809	0.000712959	0.116195	0.21	0.23	0.69	0.29	FAM9B	chrX	protein_coding	family with sequence similarity 9, member B
ENSG00000217236.1	-1.09965	-0.396283	0.00280226	0.228745	0.08	0.21	0.41	0.25	SP9	chr2	protein_coding	Sp9 transcription factor
ENSG00000260236.1	-1.10807	-0.658278	0.00495807	0.295543	0.14	0.19	0.37	0.35	RP11-708J19.1	chr3	antisense	--
ENSG00000242798.1	-1.11681	0.0883362	0.000666061	0.109608	1.09	0.83	2.2	2	RP11-506M12.1	chr7	antisense	--
ENSG00000147003.5	-1.12157	0.375402	0.000182226	0.056589	0.26	0.58	0.85	1.03	TMEM27	chrX	protein_coding	transmembrane protein 27
ENSG00000135747.11	-1.13224	-0.205129	0.00128083	0.155717	0.18	0.14	0.36	0.35	ZNF670	chr1	protein_coding	zinc finger protein 670
ENSG00000276853.1	-1.13258	-0.280484	0.0015016	0.170241	0.75	0.52	1.75	1.05	RP11-305O6.4	chr12	sense_intronic	--
ENSG00000163637.11	-1.13526	-0.744715	0.00470763	0.289578	0.03	0.04	0.09	0.06	PRICKLE2	chr3	protein_coding	prickle homolog 2 (Drosophila)
ENSG00000251023.1	-1.1392	-0.168868	0.00118529	0.150093	0.13	0.15	0.41	0.23	RP11-549J18.1	chr5	sense_intronic	--
ENSG00000255837.1	-1.14092	0.237573	0.000288888	0.0771358	0.34	0.53	0.79	1.16	TAS2R20	chr12	protein_coding	taste receptor, type 2, member 20
ENSG00000214894.6	-1.14261	-0.695171	0.00426141	0.282034	0.06	0.22	0.37	0.29	LINC00243	chr6	lincRNA	long intergenic non-protein coding RNA 243
ENSG00000228274.3	-1.14418	0.0492072	0.000508574	0.0962496	0.26	0.14	0.45	0.43	RP3-508I15.9	chr22	antisense	--
ENSG00000279608.1	-1.15507	-0.775079	0.00608826	0.328585	0.08	0.02	0.16	0.07	RP11-182N22.9	chr9	TEC	--
ENSG00000280129.1	-1.15759	-0.194667	0.00102738	0.147498	0.24	0.29	0.64	0.57	RP11-298I3.3	chr14	TEC	--
ENSG00000242094.1	-1.16648	-0.576442	0.00274049	0.224988	0.06	0.12	0.23	0.19	FOXP1-IT1	chr3	sense_intronic	FOXP1 intronic transcript 1
ENSG00000207501.1	-1.17061	-0.899349	0.00488128	0.294062	0.95	2.08	3.84	3.25	RNVU1-14	chr1	snRNA	RNA, variant U1 small nuclear 14
ENSG00000229325.1	-1.17063	0.363987	0.000132236	0.0484357	0.79	1.09	2.66	1.66	ACAP2-IT1	chr3	sense_intronic	ACAP2 intronic transcript 1
ENSG00000223117.1	-1.17546	-0.902429	0.00488128	0.294062	0.15	1.27	1.61	1.79	RN7SKP296	chr3	misc_RNA	RNA, 7SK small nuclear pseudogene 296
ENSG00000143107.8	-1.18071	0.129437	0.000299224	0.0791558	0.19	0.14	0.42	0.34	FNDC7	chr1	protein_coding	fibronectin type III domain containing 7
ENSG00000182584.4	-1.18215	-0.421883	0.00129868	0.156284	0.17	0.19	0.41	0.42	ACTL10	chr20	protein_coding	actin-like 10
ENSG00000280119.1	-1.19036	-0.762144	0.00470763	0.289578	0.06	0.05	0.12	0.15	AC093642.1	chr2	TEC	--
ENSG00000234840.1	-1.21129	-1.07	0.00797283	0.370117	0.06	0.13	0.2	0.24	LINC01239	chr9	lincRNA	long intergenic non-protein coding RNA 1239
ENSG00000274245.1	-1.2319	0.562662	1.7108e-05	0.013965	0.56	1.51	2.37	2.65	RP11-357P18.2	chr1	lincRNA	--
ENSG00000273485.1	-1.23434	-0.917411	0.00488128	0.294062	0.36	0.38	0.83	0.93	RP11-225H22.7	chr10	antisense	--
ENSG00000269378.1	-1.23555	-0.525589	0.00099556	0.144381	0.55	0.52	1.35	1.22	ITGB1P1	chr19	processed_pseudogene	integrin beta 1 pseudogene 1
ENSG00000201457.1	-1.23917	-0.917741	0.00488128	0.294062	1.35	2.19	5.48	3.15	SNORA55	chr1	snoRNA	small nucleolar RNA, H/ACA box 55
ENSG00000260190.1	-1.24008	-0.980128	0.00540599	0.313795	0.25	0.3	0.67	0.68	RP11-229P13.25	chr9	sense_overlapping	--
ENSG00000272627.1	-1.25277	-1.18456	0.00998201	0.383315	0.47	0.32	0.72	1.19	RP11-354E23.5	chr10	sense_intronic	--
ENSG00000256006.1	-1.2599	-0.838045	0.00336386	0.254247	0.96	0.93	1.83	2.76	AC084117.3	chr11	sense_intronic	--
ENSG00000206910.1	-1.26233	-0.782106	0.00193716	0.198368	1.3	2.44	5.67	3.61	SNORA29	chr6	snoRNA	small nucleolar RNA, H/ACA box 29
ENSG00000265095.1	-1.26586	-0.787177	0.00193716	0.198368	0.12	1.01	0.98	1.9	FTLP12	chr17	processed_pseudogene	ferritin, light polypeptide pseudogene 12
ENSG00000257557.2	-1.27623	0.0212945	9.21643e-05	0.0419766	0.11	0.18	0.28	0.45	RP11-84G21.1	chr12	antisense	--
ENSG00000269966.1	-1.28247	-0.0721009	0.000159326	0.0541898	0.67	0.56	1.83	1.2	RP3-331H24.5	chr6	lincRNA	--
ENSG00000255856.2	-1.29999	-0.933685	0.00306388	0.242812	0.32	0.1	0.53	0.49	RP11-87C12.5	chr12	lincRNA	--
ENSG00000271780.1	-1.30619	-0.690934	0.00163959	0.181562	0.26	0.25	0.53	0.76	RP11-1017G21.5	chr14	lincRNA	--
ENSG00000270168.2	-1.30819	-1.2367	0.00826773	0.370117	0.06	0.11	0.17	0.27	LA16c-380H5.3	chr16	protein_coding	--
ENSG00000103740.9	-1.32753	-0.801817	0.00118909	0.150093	0.02	0.05	0.09	0.1	ACSBG1	chr15	protein_coding	acyl-CoA synthetase bubblegum family member 1
ENSG00000227189.2	-1.33954	-0.85968	0.00128006	0.155717	0.05	0.17	0.33	0.25	AC092535.3	chr4	antisense	--
ENSG00000274292.1	-1.3431	-0.324266	0.000229576	0.0658483	0.09	0.18	0.43	0.29	RP11-347I19.7	chr12	lincRNA	--
ENSG00000272498.1	-1.346	-1.20889	0.00607696	0.328585	0.37	0.28	0.78	0.9	RP11-415F23.3	chr3	antisense	--
ENSG00000278996.1	-1.35264	-1.04455	0.00368719	0.268667	0.11	0.05	0.04	0.38	CH507-513H4.1	chr21	lincRNA	--
ENSG00000271321.1	-1.3545	-0.490611	0.000456666	0.0962496	0.18	0.07	0.34	0.3	CTAGE6	chr7	protein_coding	CTAGE family, member 6
ENSG00000213397.10	-1.35805	-1.04178	0.00272938	0.224722	0.11	0.05	0.25	0.18	HAUS7	chrX	protein_coding	HAUS augmin-like complex, subunit 7
ENSG00000249383.1	-1.38623	-1.18407	0.00444985	0.282034	0.12	0.09	0.25	0.31	RP11-1018N14.1	chr17	lincRNA	--
ENSG00000257607.1	-1.39514	-1.45385	0.00827091	0.370117	0.08	0.1	0.25	0.26	RP11-449P15.1	chr7	antisense	--
ENSG00000255337.1	-1.40706	-1.26076	0.00489076	0.294062	0.19	0.3	0.75	0.58	RP11-315O6.1	chr11	antisense	--
ENSG00000127364.3	-1.41124	-1.54376	0.00916468	0.372813	0.08	0.04	0.13	0.18	TAS2R4	chr7	protein_coding	taste receptor, type 2, member 4
ENSG00000213904.8	-1.41347	-0.743793	0.000831415	0.127759	0.06	0.09	0.25	0.17	LIPE-AS1	chr19	antisense	LIPE antisense RNA 1
ENSG00000152463.14	-1.41462	-1.54507	0.00916468	0.372813	0.07	0.07	0.18	0.22	OLAH	chr10	protein_coding	oleoyl-ACP hydrolase
ENSG00000184716.13	-1.41526	-1.54325	0.00916468	0.372813	0.06	0.04	0.2	0.08	SERINC4	chr15	protein_coding	serine incorporator 4
ENSG00000182771.17	-1.43135	-1.34249	0.00537449	0.313795	0	0.05	0.1	0.05	GRID1	chr10	protein_coding	glutamate receptor, ionotropic, delta 1
ENSG00000186897.4	-1.44305	-1.2334	0.00353998	0.264066	0.1	0.07	0.21	0.24	C1QL4	chr12	protein_coding	complement component 1, q subcomponent-like 4
ENSG00000275072.1	-1.44434	-1.06454	0.00159405	0.177206	3.71	1.95	8.21	7.22	SNORD50B	chr6	snoRNA	small nucleolar RNA, C/D box 50B
ENSG00000172794.19	-1.44747	-1.42699	0.00590203	0.327933	0.01	0.05	0.07	0.11	RAB37	chr17	protein_coding	RAB37, member RAS oncogene family
ENSG00000242349.5	-1.44809	-1.23231	0.00255337	0.214182	0.13	0.11	0.54	0.13	NPPA-AS1	chr1	antisense	NPPA antisense RNA 1
ENSG00000235770.5	-1.45142	-1.42649	0.00590203	0.327933	0	0.05	0.1	0.05	LINC00607	chr2	lincRNA	long intergenic non-protein coding RNA 607
ENSG00000203327.2	-1.46605	-1.13432	0.00171206	0.183886	0.23	0.17	0.75	0.38	AC012358.7	chr2	antisense	--
ENSG00000196604.11	-1.46776	0.505507	8.30213e-07	0.00148245	0.08	0.2	0.33	0.47	POTEF	chr2	protein_coding	POTE ankyrin domain family, member F
ENSG00000224397.5	-1.46904	-0.758534	0.000495186	0.0962496	0.19	0.06	0.25	0.44	LINC01272	chr20	lincRNA	long intergenic non-protein coding RNA 1272
ENSG00000163121.9	-1.48173	-1.206	0.00183579	0.194253	0.13	0.04	0.28	0.2	NEURL3	chr2	protein_coding	neuralized E3 ubiquitin protein ligase 3
ENSG00000162654.8	-1.49269	-1.60804	0.00708069	0.358494	0.03	0.01	0.05	0.06	GBP4	chr1	protein_coding	guanylate binding protein 4
ENSG00000277728.1	-1.50249	-1.28324	0.00489076	0.294062	0.56	0.15	0.89	1.09	RP11-143K11.7	chr17	antisense	--
ENSG00000267756.1	-1.50251	-0.62054	0.000249901	0.0679968	0.34	0.3	0.99	0.87	RP11-411B10.4	chr18	unprocessed_pseudogene	--
ENSG00000220305.1	-1.53108	-1.18621	0.0013159	0.156284	0.07	0.21	0.46	0.38	HNRNPH1P1	chr6	processed_pseudogene	heterogeneous nuclear ribonucleoprotein H1 pseudogene 1
ENSG00000233954.6	-1.53624	-0.937556	0.000582131	0.105933	0.06	0.13	0.34	0.22	UQCRHL	chr1	protein_coding	--
ENSG00000270640.1	-1.54047	-1.36812	0.00296887	0.238931	0.26	0.69	1.85	1.08	RP11-373D23.2	chr2	sense_intronic	--
ENSG00000235081.1	-1.55147	-1.57446	0.0049199	0.294062	0.14	0.13	0.7	0.12	AC010492.2	chr19	processed_pseudogene	--
ENSG00000239557.1	-1.55238	-1.58003	0.0049199	0.294062	0.02	0.17	0.13	0.45	RP11-168J18.6	chr3	processed_pseudogene	--
ENSG00000057149.14	-1.55363	-1.5779	0.0049199	0.294062	0.02	0.08	0.19	0.15	SERPINB3	chr18	protein_coding	serpin peptidase inhibitor, clade B (ovalbumin), member 3
ENSG00000279356.1	-1.55822	-1.00118	0.0006121	0.106945	0.05	0.13	0.35	0.2	RP11-429P3.8	chr16	TEC	--
ENSG00000273004.1	-1.56559	-1.1607	0.000940595	0.140695	0.17	0.27	0.66	0.71	GS1-279B7.2	chr1	lincRNA	--
ENSG00000132554.19	-1.57343	-1.82448	0.00836086	0.370117	0	0.04	0.04	0.09	RGS22	chr8	protein_coding	regulator of G-protein signaling 22
ENSG00000270177.1	-1.57773	-1.33939	0.0020941	0.20919	0.11	0.1	0.25	0.38	CTD-2410N18.3	chr5	lincRNA	--
ENSG00000186198.3	-1.59086	-0.981188	0.000442808	0.0951204	0.08	0.31	0.61	0.65	SLC51B	chr15	protein_coding	solute carrier family 51, beta subunit
ENSG00000247199.3	-1.59341	-1.54152	0.0064723	0.336819	0.11	0.01	0.15	0.22	RP11-373N22.3	chr5	antisense	--
ENSG00000124440.15	-1.60363	-1.54393	0.00340391	0.25592	0.02	0.02	0.08	0.04	HIF3A	chr19	protein_coding	hypoxia inducible factor 3, alpha subunit
ENSG00000267769.1	-1.61906	-1.94187	0.0089778	0.372813	0.1	0.22	0.16	0.89	CTB-50L17.9	chr19	antisense	--
ENSG00000228157.4	-1.62106	-1.93935	0.0089778	0.372813	0.05	0.06	0.26	0.11	AC007952.5	chr17	processed_transcript	--
ENSG00000176919.11	-1.66281	-1.39539	0.00154559	0.173617	0.09	0.21	0.67	0.34	C8G	chr9	protein_coding	complement component 8, gamma polypeptide
ENSG00000233012.2	-1.66348	-1.39804	0.00154559	0.173617	0.01	0.11	0.18	0.25	HDAC1P2	chr1	transcribed_processed_pseudogene	histone deacetylase 1 pseudogene 2
ENSG00000262652.1	-1.67208	-1.08942	0.000338429	0.0842912	0.26	0.31	0.74	1.12	RP13-638C3.2	chr17	sense_intronic	--
ENSG00000260339.1	-1.67721	-0.998576	0.000235582	0.0659862	0.07	0.07	0.27	0.18	HEXA-AS1	chr15	antisense	HEXA antisense RNA 1
ENSG00000068976.13	-1.67801	-0.914938	0.000165634	0.0543928	0.06	0.06	0.19	0.21	PYGM	chr11	protein_coding	phosphorylase, glycogen, muscle
ENSG00000266306.1	-1.67867	-0.916035	0.000165634	0.0543928	0.13	0.14	0.36	0.52	CTD-2008P7.6	chr17	unprocessed_pseudogene	--
ENSG00000263884.1	-1.68741	-2.0715	0.00950807	0.376762	0	0.06	0.12	0.11	RP11-705O1.8	chr18	lincRNA	--
ENSG00000104213.12	-1.69047	-1.89852	0.0059572	0.327933	0.04	0.05	0.2	0.1	PDGFRL	chr8	protein_coding	platelet-derived growth factor receptor-like
ENSG00000105251.10	-1.69166	-1.90255	0.0059572	0.327933	0	0.06	0.03	0.19	SHD	chr19	protein_coding	Src homology 2 domain containing transforming protein D
ENSG00000230534.6	-1.69364	-1.90004	0.0059572	0.327933	0.02	0.1	0.27	0.13	RP11-297A16.2	chr10	antisense	--
ENSG00000255171.5	-1.69678	-1.74733	0.00379503	0.272422	0.04	0.1	0.29	0.2	LINC01499	chr11	lincRNA	long intergenic non-protein coding RNA 1499
ENSG00000253910.2	-1.70455	-1.36532	0.00107116	0.150093	0.03	0.03	0.14	0.05	PCDHGB2	chr5	protein_coding	protocadherin gamma subfamily B, 2
ENSG00000280308.1	-1.7077	-0.893374	0.000118915	0.0471863	0.62	0.42	1.9	1.56	FKSG61	chr14	protein_coding	--
ENSG00000272449.1	-1.7084	-1.16065	0.000345291	0.0848885	0.1	0.21	0.49	0.56	RP3-395M20.12	chr1	lincRNA	--
ENSG00000280042.1	-1.71389	-0.671311	4.44705e-05	0.0288755	0.1	0.13	0.43	0.35	RP11-71H17.8	chr3	TEC	--
ENSG00000277130.1	-1.74929	-1.70976	0.00529094	0.311033	0.19	0.1	0.44	0.55	RP11-530C5.4	chr12	sense_intronic	--
ENSG00000152284.4	-1.75194	-1.4552	0.00110259	0.150093	0.01	0.07	0.13	0.15	TCF7L1	chr2	protein_coding	transcription factor 7-like 1 (T-cell specific, HMG-box)
ENSG00000279880.1	-1.76107	-2.02537	0.00617992	0.328585	0.02	0.04	0.12	0.12	RP11-855A2.2	chr17	TEC	--
ENSG00000254985.1	-1.76563	-2.02468	0.00617992	0.328585	0.05	0.2	0.87	0.05	RSF1-IT2	chr11	sense_intronic	RSF1 intronic transcript 2
ENSG00000174125.7	-1.77656	-0.119941	4.86647e-07	0.000993108	0.06	0.17	0.48	0.35	TLR1	chr4	protein_coding	toll-like receptor 1
ENSG00000261476.1	-1.79811	-1.54455	0.00112231	0.150093	0.12	0.13	0.32	0.59	RP11-77K12.3	chr16	sense_intronic	--
ENSG00000244693.1	-1.80959	-1.67567	0.00169363	0.183318	0.03	0.04	0.16	0.11	CTAGE8	chr7	protein_coding	CTAGE family, member 8
ENSG00000254419.1	-1.81148	-1.67626	0.00169363	0.183318	0.09	0.24	0.76	0.46	RP11-261P9.4	chr20	sense_intronic	--
ENSG00000243225.2	-1.81744	-1.81987	0.00564613	0.32015	0.22	0.15	0.65	0.69	RP11-7F17.1	chr14	processed_pseudogene	--
ENSG00000186335.8	-1.82061	-1.82138	0.00258638	0.214182	0.01	0.03	0.08	0.09	SLC36A2	chr5	protein_coding	solute carrier family 36 (proton/amino acid symporter), member 2
ENSG00000270412.1	-1.82409	-1.82272	0.00258638	0.214182	0	0.36	0.75	0.67	RP11-92C4.6	chr9	antisense	--
ENSG00000235568.6	-1.82988	-1.97949	0.0089778	0.372813	0.02	0	0.05	0.04	NFAM1	chr22	protein_coding	NFAT activating protein with ITAM motif 1
ENSG00000279289.1	-1.83019	-0.894421	4.27577e-05	0.0288755	0.05	0.05	0.16	0.17	RP3-331H24.6	chr6	TEC	--
ENSG00000198237.8	-1.87755	0.00549123	5.61822e-08	0.000178347	0.41	0.68	1.99	2.14	RP11-98J23.2	chr5	unprocessed_pseudogene	--
ENSG00000134827.7	-1.88413	-0.55374	3.49241e-06	0.00429547	0.11	0.17	0.76	0.34	TCN1	chr11	protein_coding	transcobalamin I (vitamin B12 binding protein, R binder family)
ENSG00000232934.7	-1.89365	-1.48414	0.000506843	0.0962496	0.05	0.08	0.1	0.4	RP11-324O2.3	chr10	antisense	--
ENSG00000215097.3	-1.8996	-1.9389	0.0059572	0.327933	0.06	0.03	0.11	0.21	DUSP8P3	chr10	processed_pseudogene	dual specificity phosphatase 8 pseudogene 3
ENSG00000149658.17	-1.90046	7.27759	1.7592e-22	1.67535e-18	19.15	14.81	72.23	55.89	YTHDF1	chr20	protein_coding	YTH N(6)-methyladenosine RNA binding protein 1
ENSG00000240441.1	-1.90057	-1.93841	0.0059572	0.327933	0.19	0.08	0.51	0.55	RP11-864J10.2	chr12	processed_pseudogene	--
ENSG00000275484.1	-1.9168	-1.60742	0.000745516	0.11833	0.15	0.22	1.06	0.41	CTC-1337H24.4	chr11	lincRNA	--
ENSG00000267551.3	-1.93057	-2.11549	0.00950807	0.376762	0.03	0.02	0.02	0.18	AC005264.2	chr19	antisense	--
ENSG00000234473.1	-1.9309	-2.11533	0.00950807	0.376762	0.06	0.04	0.07	0.32	ZNF101P2	chr1	processed_pseudogene	zinc finger protein 101 pseudogene 2
ENSG00000188227.12	-1.93317	-2.11578	0.00950807	0.376762	0	0.01	0.01	0.03	ZNF793	chr19	protein_coding	zinc finger protein 793
ENSG00000272308.1	-1.93616	-1.45261	0.000339289	0.0842912	0.27	0.19	0.4	1.39	RP11-231G3.1	chr5	lincRNA	--
ENSG00000273369.1	-1.93638	-2.11733	0.00394075	0.278682	0	0.26	0.31	0.78	RP11-700J17.1	chr4	antisense	--
ENSG00000235295.1	-1.93643	-2.11574	0.00394075	0.278682	0.01	0.04	0.12	0.09	FLJ41941	chr22	lincRNA	--
ENSG00000260018.1	-1.94132	-1.74913	0.00110564	0.150093	0	0.31	0.37	0.92	RP11-505K9.1	chr16	antisense	--
ENSG00000270116.1	-1.9579	-1.30897	0.000350741	0.0849209	0.34	0.13	1.03	0.8	AP001429.1	chr21	sense_intronic	--
ENSG00000226853.2	-1.96248	-1.57398	0.00112231	0.150093	0.16	0.09	0.55	0.44	AC010894.3	chr2	lincRNA	--
ENSG00000253463.1	-1.96841	-1.89523	0.00393375	0.278682	0.22	0.04	0.95	0.09	HMGB1P19	chr8	processed_pseudogene	high mobility group box 1 pseudogene 19
ENSG00000229425.1	-1.97003	-1.5778	0.000492502	0.0962496	0	0.18	0.41	0.37	AJ006998.2	chr21	lincRNA	--
ENSG00000183784.6	-1.97511	-1.89966	0.00165107	0.182004	0	0.05	0.15	0.05	C9orf66	chr9	protein_coding	chromosome 9 open reading frame 66
ENSG00000006606.8	-1.9856	-1.42351	0.000226615	0.0658483	0.11	0.19	0.58	0.68	CCL26	chr7	protein_coding	chemokine (C-C motif) ligand 26
ENSG00000121406.8	-2.00839	-2.07059	0.00950807	0.376762	0.01	0.01	0	0.05	ZNF549	chr19	protein_coding	zinc finger protein 549
ENSG00000239636.1	-2.01164	-2.07055	0.00247567	0.212402	0.03	0.11	0.16	0.44	RP4-728D4.2	chr1	antisense	--
ENSG00000133321.10	-2.01292	-2.07148	0.00247567	0.212402	0	0.09	0.09	0.31	RARRES3	chr11	protein_coding	retinoic acid receptor responder (tazarotene induced) 3
ENSG00000212493.1	-2.01298	-2.06832	0.00617992	0.328585	0.76	1	5.64	1.96	SNORD19	chr3	snoRNA	small nucleolar RNA, C/D box 19
ENSG00000234210.1	-2.02384	-1.39247	0.000347636	0.0848885	0.04	0.02	0.11	0.12	AC006372.4	chr7	lincRNA	--
ENSG00000237766.2	-2.03649	-1.8609	0.00105559	0.15004	0	0.12	0.24	0.31	GGTA2P	chr12	processed_pseudogene	glycoprotein, alpha-galactosyltransferase 2, pseudogene
ENSG00000259295.6	-2.051	-1.67531	0.00046689	0.0962496	0	0.01	0.04	0.02	CSPG4P12	chr15	transcribed_unprocessed_pseudogene	chondroitin sulfate proteoglycan 4 pseudogene 12
ENSG00000151322.18	-2.06659	-2.26209	0.00985266	0.379367	0.01	0	0.01	0.05	NPAS3	chr14	protein_coding	neuronal PAS domain protein 3
ENSG00000271659.1	-2.0728	-2.26378	0.00985266	0.379367	0	0.19	0.35	0.56	RP11-435O5.4	chr9	antisense	--
ENSG00000246528.3	-2.07515	-2.26263	0.00985266	0.379367	0	0.05	0.18	0.04	RP11-159H10.3	chr8	antisense	--
ENSG00000275322.1	-2.08237	-2.02237	0.00399692	0.279668	0.09	0.02	0.31	0.16	RP11-262A16.1	chr15	lincRNA	--
ENSG00000226266.6	-2.11478	-0.873811	3.05086e-06	0.00396196	0.07	0.05	0.18	0.37	AC009961.3	chr2	lincRNA	--
ENSG00000268521.1	-2.14767	-1.44851	0.000226615	0.0658483	0.35	0.1	1.48	0.54	VN1R83P	chr19	unprocessed_pseudogene	vomeronasal 1 receptor 83 pseudogene
ENSG00000140368.12	-2.14794	-1.78051	0.00110564	0.150093	0.07	0.01	0.17	0.18	PSTPIP1	chr15	protein_coding	proline-serine-threonine phosphatase interacting protein 1
ENSG00000213090.2	-2.15113	-1.98101	0.00257381	0.214182	0.03	0.02	0.06	0.14	AC007256.5	chr2	processed_pseudogene	--
ENSG00000254779.4	-2.15271	-1.78121	0.00110564	0.150093	0.1	0.09	0.61	0.28	EGLN1P1	chr15	transcribed_processed_pseudogene	egl-9 family hypoxia-inducible factor 1 pseudogene 1
ENSG00000229227.8	-2.15501	-1.98065	0.00257381	0.214182	0.05	0.07	0.35	0.21	RP11-38L15.2	chr10	lincRNA	--
ENSG00000164841.4	-2.15695	-2.21074	0.00624639	0.329261	0.03	0.03	0.16	0.11	TMEM74	chr8	protein_coding	transmembrane protein 74
ENSG00000258302.2	-2.15761	-2.21041	0.00624639	0.329261	0.03	0.03	0.19	0.08	RP11-981P6.1	chr12	antisense	--
ENSG00000216906.2	-2.15919	-2.21279	0.00225862	0.210625	0	0.04	0.09	0.12	RP11-350J20.9	chr6	processed_pseudogene	--
ENSG00000185482.7	-2.19224	-1.42126	6.00071e-05	0.033671	0.06	0.05	0.33	0.22	STAC3	chr12	protein_coding	SH3 and cysteine rich domain 3
ENSG00000042062.11	-2.19981	-1.57753	0.000125918	0.048305	0.01	0.03	0.04	0.13	FAM65C	chr20	protein_coding	family with sequence similarity 65, member C
ENSG00000236493.2	-2.21274	-1.74553	0.000271421	0.0731555	0.03	0.11	0.55	0.16	EIF2S2P3	chr10	processed_pseudogene	eukaryotic translation initiation factor 2, subunit 2 beta pseudogene 3
ENSG00000233647.2	-2.23717	-2.16053	0.00394075	0.278682	0.17	0.05	0.71	0.34	NENFP1	chr1	processed_pseudogene	neudesin neurotrophic factor pseudogene 1
ENSG00000279951.1	-2.23781	-2.1618	0.00394075	0.278682	0.03	0.03	0.16	0.16	RP11-264J4.8	chr13	TEC	--
ENSG00000122733.12	-2.26817	-2.42721	0.00984947	0.379367	0	0.01	0.02	0.04	PHF24	chr9	protein_coding	--
ENSG00000257681.1	-2.3127	-2.11369	0.00247567	0.212402	0.07	0.02	0.21	0.28	RP11-341G23.4	chr12	antisense	--
ENSG00000262075.3	-2.314	-2.11463	0.00247567	0.212402	0.01	0.01	0.04	0.06	DKFZP434A062	chr9	lincRNA	--
ENSG00000228701.1	-2.31467	-2.11271	0.00247567	0.212402	0.13	0.04	0.63	0.22	TNKS2-AS1	chr10	antisense	TNKS2 antisense RNA 1 (head to head)
ENSG00000272416.1	-2.31595	-2.11524	0.00247567	0.212402	0.03	0.09	0.29	0.39	CTD-2081C10.7	chr5	lincRNA	--
ENSG00000267065.2	-2.31628	-2.11508	0.00247567	0.212402	0.01	0.02	0.08	0.09	CTD-2246P4.1	chr17	lincRNA	--
ENSG00000267353.1	-2.36628	-2.37026	0.00605474	0.328243	0	0.03	0.07	0.11	CTD-2162K18.3	chr19	lincRNA	--
ENSG00000278376.1	-2.39016	-1.28497	7.06269e-06	0.00708409	0.03	0.07	0.23	0.32	RP11-158I9.8	chr11	lincRNA	--
ENSG00000204455.7	-2.39052	-2.07001	0.000502969	0.0962496	0	0.07	0.16	0.23	TRIM51BP	chr11	unprocessed_pseudogene	tripartite motif-containing 51B, pseudogene
ENSG00000164627.17	-2.40304	-1.82116	0.000143223	0.0511486	0	0.01	0.02	0.05	KIF6	chr6	protein_coding	kinesin family member 6
ENSG00000225224.1	-2.45425	-2.31259	0.0037051	0.268667	0.17	0	0.59	0.34	RP4-814D15.2	chr7	processed_pseudogene	--
ENSG00000130643.8	-2.45618	-2.31482	0.0037051	0.268667	0.01	0.02	0.06	0.09	CALY	chr10	protein_coding	calcyon neuron-specific vesicular protein
ENSG00000258922.1	-2.45735	-2.02199	0.000966912	0.141665	0.17	0.05	0.89	0.34	CTD-2313J17.1	chr15	sense_intronic	--
ENSG00000279544.1	-2.50498	-1.54019	5.21156e-05	0.0303866	0.03	0.01	0.2	0.08	AL133243.4	chr2	TEC	--
ENSG00000272017.1	-2.50718	-1.54061	5.21156e-05	0.0303866	0.08	0.07	0.68	0.19	RP1-199J3.7	chr6	antisense	--
ENSG00000263069.5	-2.52212	-1.04042	3.01445e-07	0.000694875	0.03	0.03	0.19	0.17	CTD-2047H16.4	chr17	antisense	--
ENSG00000266127.1	-2.52324	-1.9789	0.000601707	0.106945	0.07	0.02	0.33	0.18	ZNF415P1	chr18	processed_pseudogene	zinc finger protein 415 pseudogene 1
ENSG00000205791.3	-2.52486	-1.97967	0.000601707	0.106945	0.03	0.03	0.25	0.14	LOH12CR2	chr12	lincRNA	loss of heterozygosity, 12, chromosomal region 2 (non-protein coding)
ENSG00000279794.1	-2.53932	-1.33752	3.60838e-06	0.00429547	0.08	0.17	0.77	0.75	CTD-2621I17.3	chr19	TEC	--
ENSG00000226478.3	-2.55078	-1.50957	1.07803e-05	0.00962482	0.07	0.06	0.58	0.21	UPF3AP1	chr17	processed_pseudogene	UPF3A pseudogene 1
ENSG00000235893.5	-2.56582	-1.70882	0.000108636	0.0443406	0.1	0.13	0.81	0.59	RP11-460E7.8	chr9	processed_pseudogene	--
ENSG00000279796.1	-2.57627	-2.60878	0.00923878	0.372813	0.02	0	0.1	0.01	RP11-317F20.3	chr10	TEC	--
ENSG00000272885.1	-2.57758	-2.60976	0.00923878	0.372813	0.06	0.05	0.65	0.13	RP11-2H3.6	chr4	lincRNA	--
ENSG00000272657.1	-2.57758	-2.60976	0.00923878	0.372813	0.04	0.04	0.43	0.08	AP000320.7	chr21	processed_transcript	--
ENSG00000279066.1	-2.593	-1.93839	0.000110192	0.0443406	0	0.05	0.29	0.06	HEXDC-IT1	chr17	sense_intronic	HEXDC intronic transcript 1
ENSG00000253558.1	-2.68701	-2.54563	0.00923878	0.372813	0.02	0	0.05	0.11	CTD-2179L22.1	chr5	transcribed_processed_pseudogene	--
ENSG00000198521.11	-2.68797	-2.54676	0.00923878	0.372813	0	0	0.01	0.05	ZNF43	chr19	protein_coding	zinc finger protein 43
ENSG00000232486.1	-2.68838	-2.54496	0.00545873	0.313795	0.02	0	0.09	0.05	RP11-18B3.2	chr9	processed_pseudogene	--
ENSG00000183054.11	-2.69735	-2.16211	0.000831752	0.127759	0.01	0	0.01	0.06	RGPD6	chr2	protein_coding	RANBP2-like and GRIP domain containing 6
ENSG00000179168.14	-2.69998	-2.15921	0.000831752	0.127759	0.03	0	0.18	0.05	GGN	chr19	protein_coding	gametogenetin
ENSG00000260583.1	-2.77097	-2.11429	0.000502969	0.0962496	0.09	0.04	0.2	0.76	AP000223.42	chr21	antisense	--
ENSG00000213144.2	-2.77194	-2.11221	0.000502969	0.0962496	0.14	0	0.6	0.39	RP11-64B16.2	chr12	processed_pseudogene	--
ENSG00000171847.10	-2.7939	-2.48466	0.00545873	0.313795	0.01	0.01	0.05	0.1	FAM90A1	chr12	protein_coding	family with sequence similarity 90, member A1
ENSG00000239627.3	-2.79453	-2.48596	0.00545873	0.313795	0	0.09	0.11	0.67	RP11-124A7.1	chr4	processed_pseudogene	--
ENSG00000121797.9	-2.79458	-2.48433	0.0032136	0.246146	0.01	0.01	0.09	0.09	CCRL2	chr3	protein_coding	chemokine (C-C motif) receptor-like 2
ENSG00000263338.1	-2.79492	-2.48416	0.0032136	0.246146	0.05	0.04	0.39	0.29	RP11-235E17.3	chr17	sense_intronic	--
ENSG00000187950.8	-2.7956	-2.48383	0.0032136	0.246146	0.01	0.01	0.08	0.03	OVCH1	chr12	protein_coding	ovochymase 1
ENSG00000269202.1	-2.79589	-2.48529	0.0032136	0.246146	0	0.03	0.11	0.14	RP4-614O4.12	chr20	lincRNA	--
ENSG00000197558.11	-2.79628	-2.4835	0.0032136	0.246146	0	0	0.02	0	SSPO	chr7	protein_coding	SCO-spondin
ENSG00000132702.12	-2.89268	-2.42507	0.00188642	0.196697	0.01	0.01	0.12	0.11	HAPLN2	chr1	protein_coding	hyaluronan and proteoglycan link protein 2
ENSG00000197301.7	-2.89306	-2.42328	0.00188642	0.196697	0.01	0	0.07	0	RP11-366L20.2	chr12	antisense	--
ENSG00000261123.1	-2.97379	-1.97853	0.000110192	0.0443406	0.09	0.04	0.74	0.31	RP11-304L19.3	chr16	sense_intronic	--
ENSG00000237903.1	-3.0306	-1.93846	6.62931e-05	0.035074	0.12	0.05	0.25	1.23	RP3-404F18.5	chrX	sense_intronic	--
ENSG00000225447.1	-3.07159	-2.3146	0.000645992	0.107302	0	0.12	0.5	0.7	RPS15AP10	chr1	processed_pseudogene	ribosomal protein S15a pseudogene 10
ENSG00000281555.1	-3.09678	-1.89675	3.98599e-05	0.0288755	0	0.68	5.15	1.58	AC005071.3	chr7	miRNA	--
ENSG00000257759.2	-3.15344	-2.26161	0.000377221	0.0862177	0	0.08	0.44	0.42	RP11-486O13.4	chr14	lincRNA	--
ENSG00000253302.1	-3.29266	-2.74832	0.00762588	0.366022	0.01	0	0.01	0.13	STAU2-AS1	chr8	antisense	STAU2 antisense RNA 1
ENSG00000231948.2	-3.29301	-2.74815	0.00762588	0.366022	0.04	0	0.09	0.4	HS1BP3-IT1	chr2	sense_intronic	HS1BP3 intronic transcript 1
ENSG00000213640.3	-3.29572	-2.74845	0.00762588	0.366022	0	0.03	0.16	0.18	EEF1DP4	chr7	processed_pseudogene	eukaryotic translation elongation factor 1 delta pseudogene 4
ENSG00000132204.13	-3.29711	-2.74778	0.00762588	0.366022	0	0.01	0.07	0.02	LINC00470	chr18	lincRNA	long intergenic non-protein coding RNA 470
ENSG00000237301.1	-3.30127	-2.16108	0.000128329	0.048305	0.01	0.01	0.08	0.11	RP4-680D5.2	chr1	antisense	--
ENSG00000006210.6	-3.41894	-2.67604	0.00427103	0.282034	0	0	0.05	0	CX3CL1	chr16	protein_coding	chemokine (C-X3-C motif) ligand 1
ENSG00000265399.1	-3.43724	-2.06743	4.36092e-05	0.0288755	0.01	0.01	0.14	0.2	RP13-270P17.2	chr18	antisense	--
ENSG00000257052.1	-3.53031	-2.61121	0.00238861	0.210625	0	0.03	0.03	0.39	RP11-881M11.2	chr11	antisense	--
ENSG00000249923.1	-3.6339	-2.54591	0.00133473	0.156284	0.01	0	0.02	0.14	XXbac-B444P24.8	chr22	antisense	--
ENSG00000070915.9	-3.63488	-2.54704	0.00133473	0.156284	0	0	0	0.07	SLC12A3	chr16	protein_coding	solute carrier family 12 (sodium/chloride transporter), member 3
ENSG00000276136.1	-3.63624	-2.54637	0.00133473	0.156284	0	0.03	0.13	0.31	RP11-50I19.2	chr12	lincRNA	--
ENSG00000136881.11	-3.73437	-2.48298	0.000416523	0.0917497	0.01	0	0.08	0.04	BAAT	chr9	protein_coding	bile acid CoA:amino acid N-acyltransferase
ENSG00000263214.1	-3.82356	-2.42505	0.000416523	0.0917497	0.02	0	0.07	0.28	ZNF205-AS1	chr16	antisense	ZNF205 antisense RNA 1
ENSG00000244607.5	-3.8279	-2.42452	0.000232785	0.0658483	0	0.01	0.1	0.05	CCDC13	chr3	protein_coding	coiled-coil domain containing 13
ENSG00000237280.1	-3.91295	-2.36662	0.000130188	0.048305	0.04	0	0.52	0.15	RP11-96C23.9	chr10	sense_intronic	--
ENSG00000267312.1	-3.91329	-2.36807	0.000130188	0.048305	0	0.02	0.23	0.2	RP11-1094M14.7	chr17	processed_pseudogene	--
ENSG00000275530.1	-3.96869	-1.67323	2.04855e-07	0.000532065	0.93	0	2.44	12.83	FP671120.4	chr21	miRNA	--
ENSG00000163492.13	-3.99513	-2.31149	7.2877e-05	0.0371803	0	0	0.03	0	CCDC141	chr2	protein_coding	coiled-coil domain containing 141
ENSG00000171903.16	-4.2789	-2.11227	7.24735e-06	0.00708409	0.01	0	0.07	0.07	CYP4F11	chr19	protein_coding	cytochrome P450, family 4, subfamily F, polypeptide 11
ENSG00000278597.1	-4.4846	-0.436114	2.60012e-18	1.23809e-14	1.06	0.93	37.44	10.32	FP671120.7	chr21	miRNA	--
ENSG00000277067.4	-4.639	-0.298199	3.85016e-20	2.19998e-16	0.01	0.03	0.57	0.58	CH507-254M2.1	chr21	lincRNA	--
ENSG00000123119.11	-5.11293	-3.07119	0.00875741	0.370117	0	0	0	0.04	NECAB1	chr8	protein_coding	N-terminal EF-hand calcium binding protein 1
ENSG00000233942.1	-5.11293	-3.07119	0.00875741	0.370117	0	0	0	0.4	AC004012.1	chr7	lincRNA	--
ENSG00000258740.1	-5.11293	-3.07119	0.00875741	0.370117	0	0	0	0.31	RP11-293M10.1	chr14	lincRNA	--
ENSG00000249228.1	-5.11293	-3.07119	0.00875741	0.370117	0	0	0	0.13	RP11-769N22.1	chr4	lincRNA	--
ENSG00000179044.15	-5.11329	-3.07102	0.00875741	0.370117	0	0	0.01	0.07	EXOC3L1	chr16	protein_coding	exocyst complex component 3-like 1
ENSG00000273249.1	-5.11329	-3.07102	0.00875741	0.370117	0	0	0.03	0.23	LL09NC01-251B2.3	chr9	antisense	--
ENSG00000223935.1	-5.11329	-3.07102	0.00875741	0.370117	0	0	0.04	0.26	AC008074.3	chr2	antisense	--
ENSG00000250069.1	-5.11364	-3.07085	0.00875741	0.370117	0	0	0.02	0.05	CTB-131B5.2	chr5	sense_intronic	--
ENSG00000198542.13	-5.11364	-3.07085	0.00875741	0.370117	0	0	0.01	0.03	ITGBL1	chr13	protein_coding	integrin, beta-like 1 (with EGF-like repeat domains)
ENSG00000261587.2	-5.11364	-3.07085	0.00875741	0.370117	0	0	0.06	0.16	TMEM249	chr8	protein_coding	transmembrane protein 249
ENSG00000270813.2	-5.114	-3.07068	0.00875741	0.370117	0	0	0.15	0.24	NANOGNBP3	chrX	processed_pseudogene	NANOGNB pseudogene 3
ENSG00000229676.2	-5.114	-3.07068	0.00875741	0.370117	0	0	0.02	0.03	ZNF492	chr19	protein_coding	zinc finger protein 492
ENSG00000154262.12	-5.114	-3.07068	0.00875741	0.370117	0	0	0.01	0.02	ABCA6	chr17	protein_coding	ATP-binding cassette, sub-family A (ABC1), member 6
ENSG00000228169.3	-5.114	-3.07068	0.00875741	0.370117	0	0	0.17	0.27	PPIAP19	chr10	processed_pseudogene	peptidylprolyl isomerase A (cyclophilin A) pseudogene 19
ENSG00000090376.8	-5.114	-3.07068	0.00875741	0.370117	0	0	0.01	0.01	IRAK3	chr12	protein_coding	interleukin-1 receptor-associated kinase 3
ENSG00000272719.1	-5.114	-3.07068	0.00875741	0.370117	0	0	0.16	0.26	CTB-161C1.1	chr7	antisense	--
ENSG00000231056.1	-5.11436	-3.07051	0.00875741	0.370117	0	0	0.43	0.42	RP1-290I10.5	chr6	lincRNA	--
ENSG00000207924.2	-5.11507	-3.07017	0.00875741	0.370117	0	0	1.36	0.44	MIR196A2	chr12	miRNA	microRNA 196a-2
ENSG00000271204.1	-5.11507	-3.07017	0.00875741	0.370117	0	0	0.08	0.03	RP11-138A9.1	chr7	lincRNA	--
ENSG00000140873.15	-5.11507	-3.07017	0.00875741	0.370117	0	0	0.03	0.01	ADAMTS18	chr16	protein_coding	ADAM metallopeptidase with thrombospondin type 1 motif, 18
ENSG00000258412.1	-5.11507	-3.07017	0.00875741	0.370117	0	0	0.36	0.12	RP11-404P21.5	chr14	sense_intronic	--
ENSG00000272551.1	-5.11507	-3.07017	0.00875741	0.370117	0	0	0.2	0.07	RP11-324L17.1	chr2	lincRNA	--
ENSG00000253286.5	-5.11543	-3.07	0.00875741	0.370117	0	0	0.2	0.03	CTD-2552K11.2	chr8	antisense	--
ENSG00000199683.1	-5.11578	-3.06982	0.00875741	0.370117	0	0	0.67	0	RN7SKP185	chr20	misc_RNA	RNA, 7SK small nuclear pseudogene 185
ENSG00000273851.1	-5.11578	-3.06982	0.00875741	0.370117	0	0	0.11	0	RP11-809H16.3	chr15	transcribed_processed_pseudogene	--
ENSG00000228573.1	-5.11578	-3.06982	0.00875741	0.370117	0	0	0.53	0	RP11-279N8.1	chr13	lincRNA	--
ENSG00000268870.1	-5.27806	-2.98352	0.00452123	0.282034	0	0	0	0.39	CTD-3105H18.16	chr19	protein_coding	--
ENSG00000248493.1	-5.27806	-2.98352	0.00452123	0.282034	0	0	0	0.3	AC005351.1	chr5	processed_pseudogene	--
ENSG00000250687.6	-5.27841	-2.98335	0.00452123	0.282034	0	0	0.02	0.19	RP11-497H16.7	chr5	transcribed_unprocessed_pseudogene	--
ENSG00000259232.2	-5.27841	-2.98335	0.00452123	0.282034	0	0	0.09	0.72	RP11-349G13.1	chr15	processed_pseudogene	--
ENSG00000160683.4	-5.27877	-2.98318	0.00452123	0.282034	0	0	0.01	0.04	CXCR5	chr11	protein_coding	chemokine (C-X-C motif) receptor 5
ENSG00000012223.12	-5.27877	-2.98318	0.00452123	0.282034	0	0	0.02	0.06	LTF	chr3	protein_coding	lactotransferrin
ENSG00000265320.1	-5.27912	-2.98301	0.00452123	0.282034	0	0	0.82	1.6	AL391650.1	chr1	miRNA	--
ENSG00000253430.1	-5.27912	-2.98301	0.00452123	0.282034	0	0	0.16	0.31	RP11-14I17.2	chr8	sense_intronic	--
ENSG00000272186.1	-5.27947	-2.98284	0.00452123	0.282034	0	0	0.34	0.41	RP11-110I1.13	chr11	antisense	--
ENSG00000265094.1	-5.27947	-2.98284	0.00452123	0.282034	0	0	0.39	0.47	RP11-178F10.1	chr18	sense_intronic	--
ENSG00000249736.1	-5.27947	-2.98284	0.00452123	0.282034	0	0	0.17	0.21	RP11-83M16.5	chr5	lincRNA	--
ENSG00000249947.2	-5.27983	-2.98267	0.00452123	0.282034	0	0	0.21	0.16	XBP1P1	chr5	processed_pseudogene	X-box binding protein 1 pseudogene 1
ENSG00000235098.8	-5.28018	-2.9825	0.00452123	0.282034	0	0	0.06	0.03	ANKRD65	chr1	protein_coding	ankyrin repeat domain 65
ENSG00000243081.2	-5.28053	-2.98233	0.00452123	0.282034	0	0	0.12	0.03	RP11-231E6.1	chr3	lincRNA	--
ENSG00000267731.1	-5.28053	-2.98233	0.00452123	0.282034	0	0	0.07	0.02	RP11-147L13.8	chr17	lincRNA	--
ENSG00000226010.1	-5.28053	-2.98233	0.00452123	0.282034	0	0	0.11	0.03	RP11-403E24.1	chrX	processed_pseudogene	--
ENSG00000279513.1	-5.28053	-2.98233	0.00452123	0.282034	0	0	0.13	0.04	RP4-675C20.4	chr1	TEC	--
ENSG00000248394.1	-5.28124	-2.98198	0.00452123	0.282034	0	0	0.3	0	FOSL1P1	chr4	processed_pseudogene	FOS-like antigen 1 pseudogene 1
ENSG00000187902.11	-5.28124	-2.98198	0.00452123	0.282034	0	0	0.04	0	SHISA7	chr19	protein_coding	shisa family member 7
ENSG00000204904.7	-5.42759	-2.90017	0.00234306	0.210625	0	0	0.21	0.31	LINC01545	chrX	lincRNA	long intergenic non-protein coding RNA 1545
ENSG00000277440.1	-5.42794	-2.9	0.00234306	0.210625	0	0	0.24	0.23	RP11-295D4.5	chr16	sense_intronic	--
ENSG00000113205.4	-5.42829	-2.89983	0.00234306	0.210625	0	0	0.03	0.02	PCDHB3	chr5	protein_coding	protocadherin beta 3
ENSG00000109991.8	-5.42934	-2.89932	0.00234306	0.210625	0	0	0.13	0.01	P2RX3	chr11	protein_coding	purinergic receptor P2X, ligand gated ion channel, 3
ENSG00000236760.1	-5.42934	-2.89932	0.00234306	0.210625	0	0	0.26	0.03	AC019118.3	chr2	lincRNA	--
ENSG00000234993.1	-5.42969	-2.89915	0.00234306	0.210625	0	0	0.24	0	CUBNP2	chr10	unprocessed_pseudogene	cubilin (intrinsic factor-cobalamin receptor) pseudogene 2
ENSG00000172733.11	-5.56152	-2.82213	0.00121881	0.150093	0	0	0.02	0.06	PURG	chr8	protein_coding	purine-rich element binding protein G
ENSG00000237596.6	-5.56257	-2.82162	0.00121881	0.150093	0	0	0.03	0.02	RP13-143G15.4	chr6	antisense	--
ENSG00000173258.12	-5.56257	-2.82162	0.00121881	0.150093	0	0	0.03	0.02	ZNF483	chr9	protein_coding	zinc finger protein 483
ENSG00000234699.1	-5.56292	-2.82145	0.00121881	0.150093	0	0	0.29	0.16	RP11-225H22.4	chr10	antisense	--
ENSG00000238062.5	-5.56292	-2.82145	0.00121881	0.150093	0	0	0.05	0.03	SPATA3-AS1	chr2	lincRNA	SPATA3 antisense RNA 1 (head to head)
ENSG00000279319.1	-5.56292	-2.82145	0.00121881	0.150093	0	0	0.06	0.03	RP11-693M3.1	chr18	TEC	--
ENSG00000235370.6	-5.56326	-2.82128	0.00121881	0.150093	0	0	0.02	0.01	DNM1P51	chr15	transcribed_unprocessed_pseudogene	dynamin 1 pseudogene 51
ENSG00000241400.1	-5.684	-2.74809	0.000636352	0.106945	0	0	0.15	0.74	RP11-764I5.1	chr3	processed_pseudogene	--
ENSG00000236474.1	-5.684	-2.74809	0.000636352	0.106945	0	0	0.04	0.21	GCNT1P1	chr20	processed_pseudogene	glucosaminyl (N-acetyl) transferase 1, core 2 pseudogene 1
ENSG00000188730.4	-5.68538	-2.74742	0.000636352	0.106945	0	0	0.01	0.01	VWC2	chr7	protein_coding	von Willebrand factor C domain containing 2
ENSG00000232310.6	-5.79682	-2.67767	0.000333462	0.0842912	0	0	0.03	0.33	RP11-557H15.4	chr6	lincRNA	--
ENSG00000279349.1	-5.79784	-2.67716	0.000333462	0.0842912	0	0	0.04	0.09	RP11-147G7.3	chr3	TEC	--
ENSG00000146521.9	-5.79853	-2.67683	0.000333462	0.0842912	0	0	0.1	0.11	LINC01558	chr6	lincRNA	long intergenic non-protein coding RNA 1558
ENSG00000064270.12	-5.90138	-2.61052	0.000175374	0.0556716	0	0	0	0.11	ATP2C2	chr16	protein_coding	ATPase, Ca++ transporting, type 2C, member 2
ENSG00000166920.10	-5.90377	-2.60935	9.25631e-05	0.0419766	0	0	0.2	0.2	C15orf48	chr15	protein_coding	chromosome 15 open reading frame 48
ENSG00000266411.1	-6.09139	-2.48426	4.90279e-05	0.0298027	0	0	0.06	0.41	RP11-180P8.3	chr17	lincRNA	--
ENSG00000142959.4	-6.18012	-2.42384	1.38992e-05	0.0116794	0	0	0.13	0.09	BEST4	chr1	protein_coding	bestrophin 4
ENSG00000138379.4	-6.54611	-2.16019	6.30988e-07	0.00120182	0	0	0.08	0.13	MSTN	chr2	protein_coding	myostatin
ENSG00000259384.6	-9.13129	0.0942338	1.32803e-30	1.89709e-26	0	0	2.42	1.94	GH1	chr17	protein_coding	growth hormone 1
